1 **Differences in pathways contributing to thyroid hormone effects on postnatal**  
2 **cartilage calcification versus secondary ossification center development**

3

4 **Authors:** Gustavo A. Gomez<sup>1</sup>, Patrick Aghajanian<sup>2</sup>, Sheila Pourteymoor<sup>1</sup>, Destiney  
5 Larkin<sup>1</sup>, Subburaman Mohan<sup>1,3,4,5\*</sup>

6

7 **Affiliations:** <sup>1</sup> Musculoskeletal Disease Center, Jerry L. Pettis VA Medical Center, Loma  
8 Linda, CA 92357, USA; <sup>2</sup> Fulgent Genetics, El Monte, CA 91733, USA; <sup>3</sup>Departments of  
9 Medicine, Loma Linda University, Loma Linda, CA 92354, USA; <sup>4</sup> Departments of  
10 Biochemistry, Loma Linda University, Loma Linda, CA 92354, USA; <sup>5</sup> Departments of  
11 Physiology, Loma Linda University, Loma Linda, CA 92354, USA.

12

13

14 **Funding:** This work was supported by National Institutes of Health Grant R01 AR048139  
15 (SM), R21 AG062866 (SM) and Veterans Administration BLR&D Grant BX005263 (SM).  
16 SM is a recipient of Senior Research Career Scientist Award from Veterans  
17 Administration.

18

19

20 **Emails:**

- 21 • Gustavo A. Gomez: Gustavo.Gomez2@va.gov, ORCID:0000-0001-9294-4276
- 22 • Patrick Aghajanian: jedirabiz@gmail.com
- 23 • Sheila Pourteymoor: Sheila.Pourteymoor@va.gov
- 24 • Destiney Larkin: Destiney.Larkin@va.gov
- 25 • Subburaman Mohan: [Subburaman.Mohan@va.gov](mailto:Subburaman.Mohan@va.gov), ORCID:0000-0003-0063-  
26 986X

27

28 **\*Corresponding Author:**

29 Subburaman Mohan, Ph.D., Musculoskeletal Disease Center, Research Service, VA  
30 Loma Linda Healthcare Systems, 11201 Benton Street, Loma Linda CA 92357, USA;  
31 Tel. +1-909-825-7084 X6180; Email: [Subburaman.Mohan@va.gov](mailto:Subburaman.Mohan@va.gov)

32

33 **Key Words:** thyroid hormone, endochondral bone formation, cartilage calcification,  
34 chondrocytes, osteoblasts, femoral head

35

36 **Supplementary Material:** This manuscript contains supplementary information, figures  
37 and tables

38

39 **Disclosure:** The authors have declared that no conflict of interest exists.

40 **Abstract**

41 The proximal and distal femur epiphysis of mice are both weight bearing structures  
42 derived from chondrocytes but differ in development. Mineralization at the distal epiphysis  
43 occurs in an osteoblast rich secondary ossification center (SOC), while the chondrocytes  
44 of the proximal femur head (FH) in particular, are directly mineralized. Thyroid hormone  
45 (TH) plays important roles in distal knee SOC formation, but whether TH also affects  
46 proximal FH development remains unexplored. Here, we found that TH controls  
47 chondrocyte maturation and mineralization at the FH *in vivo* through studies in *Thyroid*  
48 *stimulating hormone receptor (Tshr<sup>-/-</sup>)* hypothyroid mice by X-ray, histology,  
49 transcriptional profiling, and immunofluorescence staining. Both *in vivo*, and *in vitro*  
50 studies conducted in ATDC5 chondrocyte progenitors concur that TH regulates  
51 expression of genes that modulate mineralization (*Bsp*, *Ocn*, *Dmp1*, *Opn*, and *Alp*). Our  
52 work also delineates differences in prominent transcription factor regulation of genes  
53 involved in the different mechanisms leading to proximal FH cartilage calcification and  
54 endochondral ossification at the distal femur. The information on the molecular pathways  
55 contributing to postnatal cartilage calcification can provide insights on therapeutic  
56 strategies to treat pathological calcification that occurs in soft tissues such as aorta,  
57 kidney, and articular cartilage.

58  
59  
60  
61  
62  
63  
64  
65  
66  
67  
68  
69  
70

## 71 **Introduction**

72           Bones make up the infrastructure of the body and are formed through a process  
73 known as ossification. Most bones are formed by endochondral ossification where  
74 condensed mesenchymal stem cells (MSCs) proliferate and differentiate into  
75 chondrocytes. Ossification first occurs in the mid-shaft of the bone, which forms the  
76 primary center of ossification (POC) and expands towards the ends of the cartilage matrix.  
77 In mice, the POC has been established to occur during embryonic development day (E)  
78 E14.5 – 15.5 while the secondary ossification center (SOC) forms at approximately  
79 postnatal day (P) 5-7 at the epiphyseal ends (Mackie, Tatarczuch, & Mirams, 2011). Each  
80 stage of skeletal development from chondrocytes can be characterized by the expression  
81 level of specific genes. Early chondrocytes which are characterized by expression of  
82 collagen type 2 (COL2), and Aggrecan (ACAN) undergo proliferation, withdraw from the  
83 cell cycle, and differentiate into pre-hypertrophic chondrocytes expressing Indian  
84 hedgehog (IHH) and Osterix (OSX). Hypertrophic chondrocytes express high levels of a  
85 cartilage matrix consisting of matrix metalloproteinase 13 (MMP13) and collagen type 10  
86 (COL10), creating a template for bone formation. Expression of vascular endothelial  
87 growth factor (VEGF) subsequently leads to invasion by capillaries, which allows the  
88 influx of osteoblasts, osteoclasts, and bone marrow cells to replace the cartilage matrix  
89 with mineralized bone (Li & Dong, 2016; Mackie et al., 2011; Takarada et al., 2016). The  
90 growth plate is responsible for longitudinal skeletal growth and skeletal maturity is  
91 reached when the primary and secondary ossification centers meet (Mackie et al., 2011).

92           Thyroid hormone (TH) is an important regulator of skeletal growth and  
93 development. Optimal levels of TH peak simultaneously with the initiation of SOC  
94 formation and are essential for its development (Aghajanian, Xing, Cheng, & Mohan,  
95 2017; Kim & Mohan, 2013; Xing, Cheng, Wergedal, & Mohan, 2014). Dysregulation in the  
96 amount of TH during skeletal development can lead to growth arrest, and delayed bone  
97 formation in both humans and mice (Bassett et al., 2008; Gogakos, Duncan Bassett, &  
98 Williams, 2010; Kim & Mohan, 2013). Previous work from our group has substantiated  
99 the importance of TH in bone formation. We found that TH regulates the development of  
100 the SOC through IHH signaling and OSX activity, and that TH is a major regulator of a  
101 number of key bone growth factors, including insulin-like growth factor-I (IGF-1) (Mohan

102 et al., 2003; L. Wang, Shao, & Ballock, 2010; Y. Wang et al., 2006). We also established  
103 that TH deficient *Tshr*<sup>-/-</sup> mice have severely compromised development of the epiphysis  
104 in both the femur and tibia at the knee joint, which is completely rescuable by TH  
105 treatment for 10 days when serum levels of TH rise in wild type mice (Xing et al., 2014).  
106 Additionally, we found that TH regulates SOC formation at the epiphysis of the distal  
107 femur and proximal tibia, by a TH induced chondrocyte-to-osteoblast transdifferentiation  
108 mechanism (Aghajanian et al., 2017).

109 Previous studies have revealed that bone development culminates at a later  
110 timepoint in the proximal femur relative to the distal femur, suggesting a difference in  
111 developmental mechanisms (Patton & Kaufman, 1995). A recent study in mice by Cole  
112 et al. (2013) found that the proximal and distal femur had different developmental patterns  
113 in terms of timing, vascular development, and ossification. While the cartilage template at  
114 the distal epiphysis was replaced by bone matrix via a chondrocyte-to-osteoblast  
115 transdifferentiation-mediated endochondral ossification process, at the proximal femoral  
116 epiphysis cartilage was directly mineralized without the involvement of an SOC (Cole et  
117 al., 2013). In this work, we examined whether TH is also involved in regulating cartilage  
118 mineralization at the proximal femur epiphysis and the mechanisms for the differential  
119 effects of TH-mediated endochondral ossification at the epiphyseal structures of the knee  
120 versus direct cartilage mineralization at chondrocytes of the femur head. Our findings  
121 demonstrate for the first time, the mechanisms that contribute to differential development  
122 of the proximal versus distal femur, providing novel information on the physiological and  
123 conceivably, pathological means of soft tissue mineralization.

124

125

126

127

128

129

130

131

132

## 133 Results

### 134 TH is necessary for mineralization of the proximal femur head

135 In order to determine whether the cartilage mineralization that occurs at the  
136 proximal femur of mice (Cole et al., 2013) is dependent on TH signaling, we evaluated  
137 the hip joints of hypothyroid *Tshr*<sup>-/-</sup> and euthyroid *Tshr*<sup>+/-</sup> mice on day 21. X-ray imaging  
138 of genotyped mice revealed that compared with the tight apposition of the femur head  
139 (FH) with the acetabulum of the pelvic bone in *Tshr*<sup>+/-</sup> heterozygotes, a distinct gap was  
140 evident between the FH and acetabulum in *Tshr*<sup>-/-</sup> mice (Figure 1A). Given that injection  
141 of TH on days 5-14 restores the SOC defect at the distal femur (Xing et al., 2014), we  
142 tested whether the defect observed at the proximal femur is also directly dependent on  
143 TH. While all three of the proximal femur structures (greater trochanter, femur head and  
144 lesser trochanter) were underdeveloped in *Tshr*<sup>-/-</sup> injected with vehicle compared to  
145 *Tshr*<sup>+/-</sup> control mice (Figure 1B), restoration of all three structures in *Tshr*<sup>-/-</sup> injected with

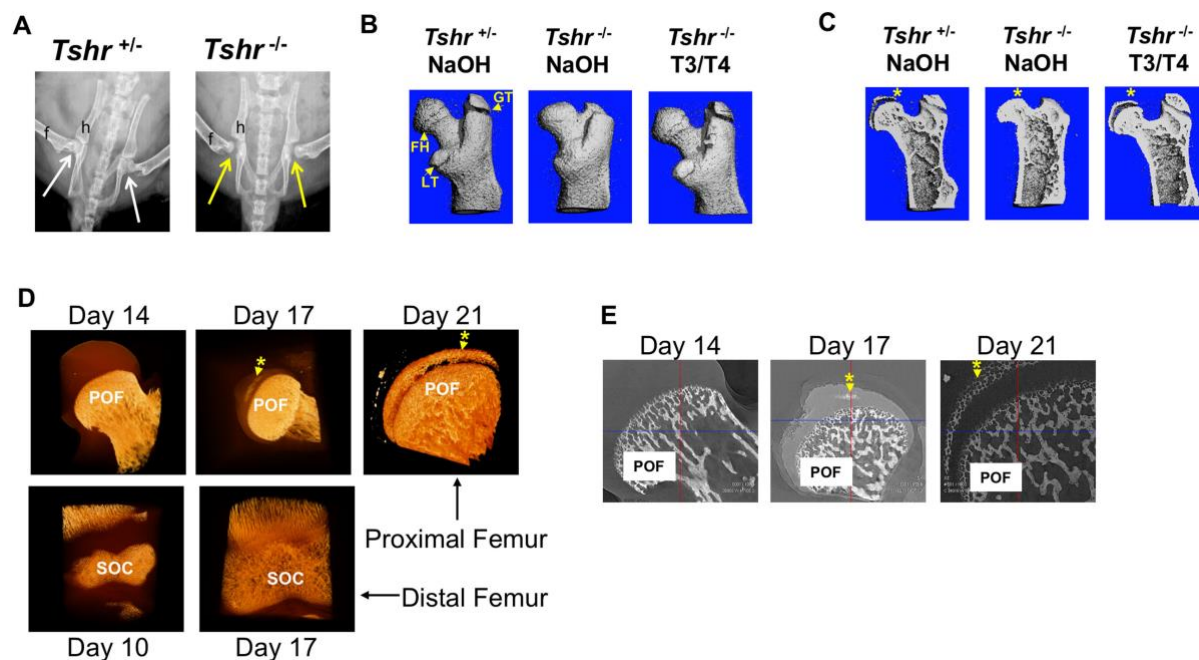

**Figure 1. *Tshr*<sup>-/-</sup> proximal femur phenotype and onset of mineralization**

(Panel A) Ventral X-ray view of postnatal (P)21 day old mice. Arrows point to joint between hip (h) and femur (f). (Panel B) Lateral view of 3 dimensional  $\mu$ CT scans from P21 proximal femurs. FH = Femur Head, GT = Greater Trochanter; LT = Lesser Trochanter. (Panel C) Lateral  $\mu$ CT hemi-section view of proximal femurs. Asterisk adjacent to region mineralized in FH. (Panel D) Lateral views of 3D nano-CT images of proximal FH (top row), and distal femur epiphysis (bottom row). Mineralized tissue is opaque ivory/gold colored. (Panel E) 2 dimensional sections of nano-CT. Mineralized tissue is white/bright grey. POF: Primary Ossification Front, SOC: Secondary Ossification Center. Asterisk and arrow point to mineralization at Femur head. Images shown are representative of 3-5 mice per group.

146 T3/T4 indicates TH signaling also regulates development and mineralization of the  
147 proximal femur epiphysis (Figure 1C).

148 Although mineralization of both distal femur and proximal tibia epiphysis initiates  
149 by the end of the first week after birth in mice (Aghajanian et al., 2017; Mackie et al.,  
150 2011), the time at which mineralization initiates in the proximal femur epiphysis remains  
151 poorly defined. Consequently, we evaluated the earliest appearance of mineralization in  
152 proximal FH cartilage in *Tshr*<sup>+/-</sup> control mice by high resolution nano-computed  
153 tomography (nano-CT). Our data revealed a 10 day delay in the initiation of mineralization  
154 at the FH compared to the distal femoral epiphysis (Figure 1D,E).

155

### 156 **FH cartilage mineralization is delayed in hypothyroid mice**

157 To further characterize the tissue mineralized at the FH, longitudinal sections of  
158 proximal femurs of euthyroid *Tshr*<sup>+/-</sup> and hypothyroid *Tshr*<sup>-/-</sup> mice were compared at P10  
159 and P21 by histology staining for cartilage (Safranin O and toluidine blue), bone (Von  
160 Kossa) and mineral (Alizarin red). Relative to *Tshr*<sup>+/-</sup> controls, the cartilage area was  
161 greater at the proximal FH in *Tshr*<sup>-/-</sup> mice (Figure 2A,B). In the proximal FH, alizarin red  
162 and Von Kossa mineral staining were only detected on day 21 of *Tshr*<sup>+/-</sup> controls (Figure  
163 2C, D), which corroborates nanoCT results. The proximal FH of *Tshr*<sup>-/-</sup> is eventually  
164 mineralized in more mature mice (Figure 2 Supplement1). Conversely, extensive mineral  
165 staining was seen at the distal femur SOC in euthyroid mice at both time points, but to a  
166 reduced extent in the distal femur SOC of *Tshr*<sup>-/-</sup> mice on day 21 (Figure 2C,D).  
167 Interestingly, positive staining for tartrate resistant acid phosphatase (TRAP) was found  
168 in the actively mineralizing region of distal femur SOC (Figure 2E), which was also  
169 dependent on TH status. However, TRAP staining was not detected in the FH of either  
170 genotype, even on day 21. These data suggest that while TH seems to play an important  
171 role in the mineralization of proximal FH as in the case of the distal femur, there are  
172 important differences in when mineralization occurs, and the type of tissue being  
173 mineralized at both ends.

174

175

176

177

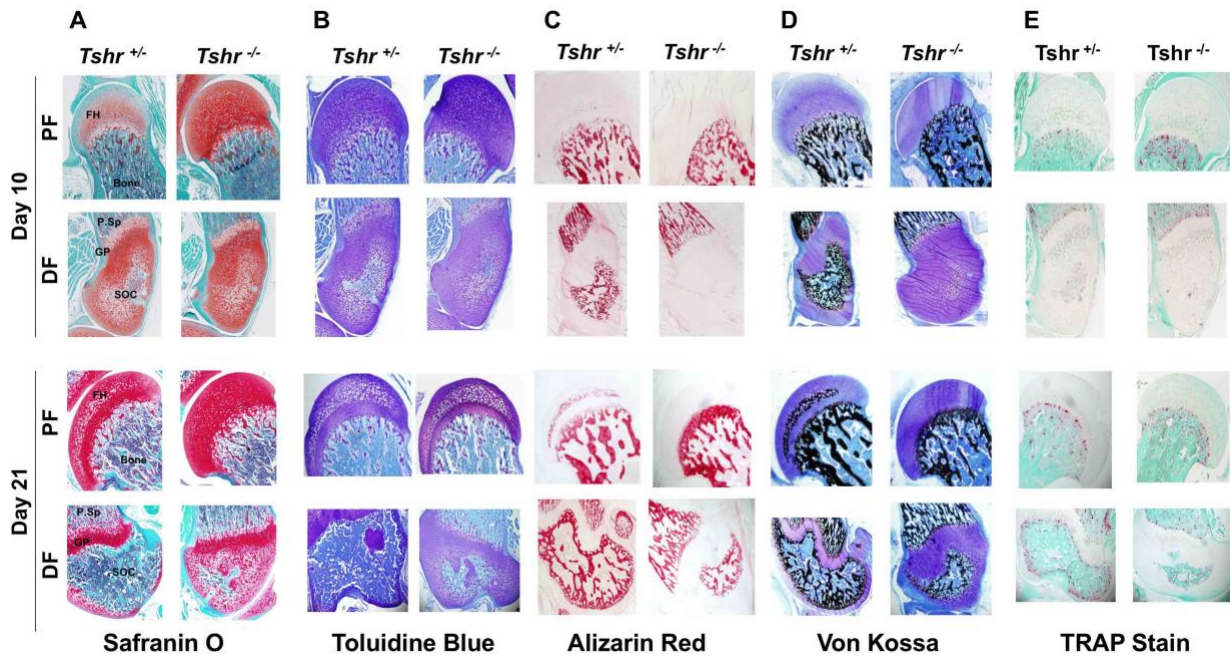

**Figure 2. Histological analysis of FH in euthyroid *Tshr*<sup>+/+</sup> and hypothyroid *Tshr*<sup>-/-</sup> mice.**

Safranin O stained sections showing cartilage in red (Panel A), Toluidene blue stained sections showing cartilage in violet (Panel B), Alizarin red stained sections showing mineral in red (Panel C), Von Kossa stained sections showing mineral in black (Panel D), and TRAP stained sections showing TRAP activity in red (Panel E) at the proximal femur, PF, and distal femur, DF, from *Tshr*<sup>+/+</sup> and *Tshr*<sup>-/-</sup> mice. P.Sp = primary spongiosa; GP = growth plate; SOC = secondary ossification center.

178

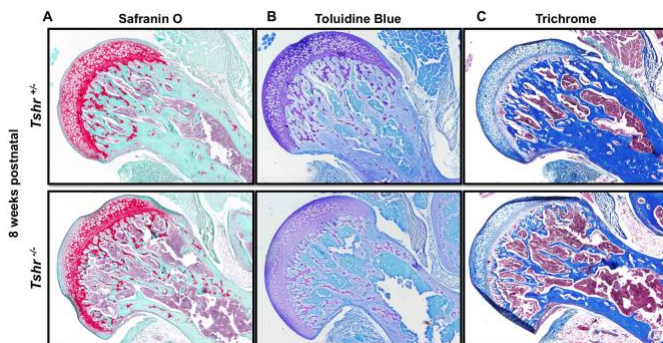

**Figure 2 Supplement 1. Delayed mineralization in *Tshr*<sup>-/-</sup> FH.** Postnatal week 8 proximal femur sections stained in red for Safranin O (Panel A), Violet for Toluidine Blue (Panel B), dark blue-mineral, light blue-collagen, red-nuclei for Trichrome (Panel C).

179

## 180 **Transcription profiles reveal delay in chondrocyte maturation in FH of *Tshr*<sup>-/-</sup> mice**

181 Given that TH elicits distinct responses at proximal FH and distal femur epiphysis,  
 182 which both develop from chondrocytes, we compared transcriptional changes of genes  
 183 involved in chondrocyte/osteoblast maturation and ECM remodeling at both sites on days  
 184 10 and 21 between *Tshr*<sup>+/+</sup> controls and *Tshr*<sup>-/-</sup> mice that were treated with or without TH

185 by Reverse Transcriptase quantitative Polymerase Chain Reaction (RT-qPCR). A delay  
186 in maturation at both ends in day 10 hypothyroid femurs was evident by reduced mRNA  
187 levels of genes expressed in mature chondrocytes *Ihh*, *Rankl*, *Sp7/Osx*, *Col10*, *Alp* and  
188 *Mmp13* (Figure 3A-D). Moreover, markers of immature chondrocytes *Shh* and *Sox9* were  
189 increased, but only significantly at the FH (Figure 3A,B), indicating a more substantial  
190 delay in maturation of FH chondrocytes on day 10. TH treatment increased *Col10*  
191 expression in the distal femur but not proximal FH at day 10, further supporting a delay in  
192 chondrocyte maturation at the FH.

193 Furthermore, while expression levels of genes involved in mineralization, *Bsp*, *Opn*  
194 and *Trap2*, were reduced, *Mgp* expression was elevated at the distal femur of day 10  
195 *Tshr<sup>-/-</sup>* mice, but none of these were affected in the FH (Figure 3C,D). These data are  
196 consistent with the histology data demonstrating active mineralization at distal but not  
197 proximal FH at this timepoint. Since others, and we, have shown a key role for hypoxia  
198 signaling in chondrocyte maturation (Cheng, Aghajanian, Pourteymoor, Alarcon, &  
199 Mohan, 2016; Cheng, Pourteymoor, Alarcon, & Mohan, 2017; Schipani et al., 2001;  
200 Yellowley & Genetos, 2019), we measured expression of hypoxia signaling genes and  
201 found that in day 10 *Tshr<sup>-/-</sup>* femurs the expression levels of *Hif1 $\alpha$*  was unchanged at both  
202 the FH and distal femur (Figure 3A,B), while *Hif2 $\alpha$*  and *Vegf* were reduced at the FH and  
203 not restored by TH treatment (Figure 3A,B). *Tgf $\alpha$*  expression was negatively regulated  
204 by TH at the FH but not at the distal femur (Figure 3A), thus suggesting region-specific  
205 effects of TH on the femur.

206 On day 21, femurs of hypothyroid mice continued to display profiles suggesting a  
207 delay in maturation. Expression levels of immature chondrocyte markers, *Sox9* and *Acan*,  
208 were increased at both ends, yet reduced by TH treatment (Figure 3F,G). While *Col2*  
209 mRNA levels were unchanged, *Col10* mRNA levels were reduced in the FH of *Tshr<sup>-/-</sup>*  
210 mice (Figure 3G). Increased mRNA levels of *Ihh* in both proximal and distal femurs of  
211 *Tshr<sup>-/-</sup>* mice were also restored to control levels by TH treatment, thus suggesting a role  
212 for *Ihh* in chondrocyte maturation. *Alp* and *Trap* transcripts were reduced at the proximal  
213 FH but not distal femur of *Tshr<sup>-/-</sup>* mice at day 21 and rescued by TH (Figure 3H). TH  
214 treatment produced opposite effects on *Bsp* expression at the two femoral sites in *Tshr<sup>-/-</sup>*  
215 mice on day 21. By contrast, the reduced *Ocn* mRNA levels at the proximal FH and distal



216 femur of *Tshr*<sup>-/-</sup> mice at day 21 were rescued by TH treatment (Figure 3G). Interestingly,  
217 expression levels of growth factors *Bmp2* and *Opg* were elevated at both ends of the  
218 femur in *Tshr*<sup>-/-</sup> mice on day 21 and rescued by TH treatment (Figure 3E). Although  
219 expression of *Runx2* and *β-cat* were not affected at either FH or distal femur (Figure 3F),  
220 TH treatment increased their expression at the FH only. Thus, while TH is required for  
221 continuous maturation of chondrocytes and affects common pathways, it can also  
222 differentially regulate distinct genes at the proximal FH and distal femur epiphysis.

223 To further characterize temporal changes of chondrocyte maturation at FH and  
224 distal femur, we compared changes in expression levels of genes in the FH relative to  
225 stage matched distal femurs on days 10 and 21 in *Tshr*<sup>+/-</sup> euthyroid mice. The reduced  
226 expression of *Ihh*, *Rankl*, *Osx*, *Mmp13*, *Bsp* and *Alp* (Figure 3I) at day 10 were consistent  
227 with the delayed maturation of chondrocytes at the proximal FH. However, at day 21,  
228 many of these genes were expressed at higher levels in the FH, a finding consistent with  
229 active mineralization occurring at this time. Therefore, transcriptional profile data reveals  
230 that chondrocytes are at a relatively more immature state in the FH of day 10 compared  
231 to day 21, and there was a catch up in maturation as noted by increased expression of  
232 genes associated with chondrocyte maturation and mineralization in the FH on day 21.

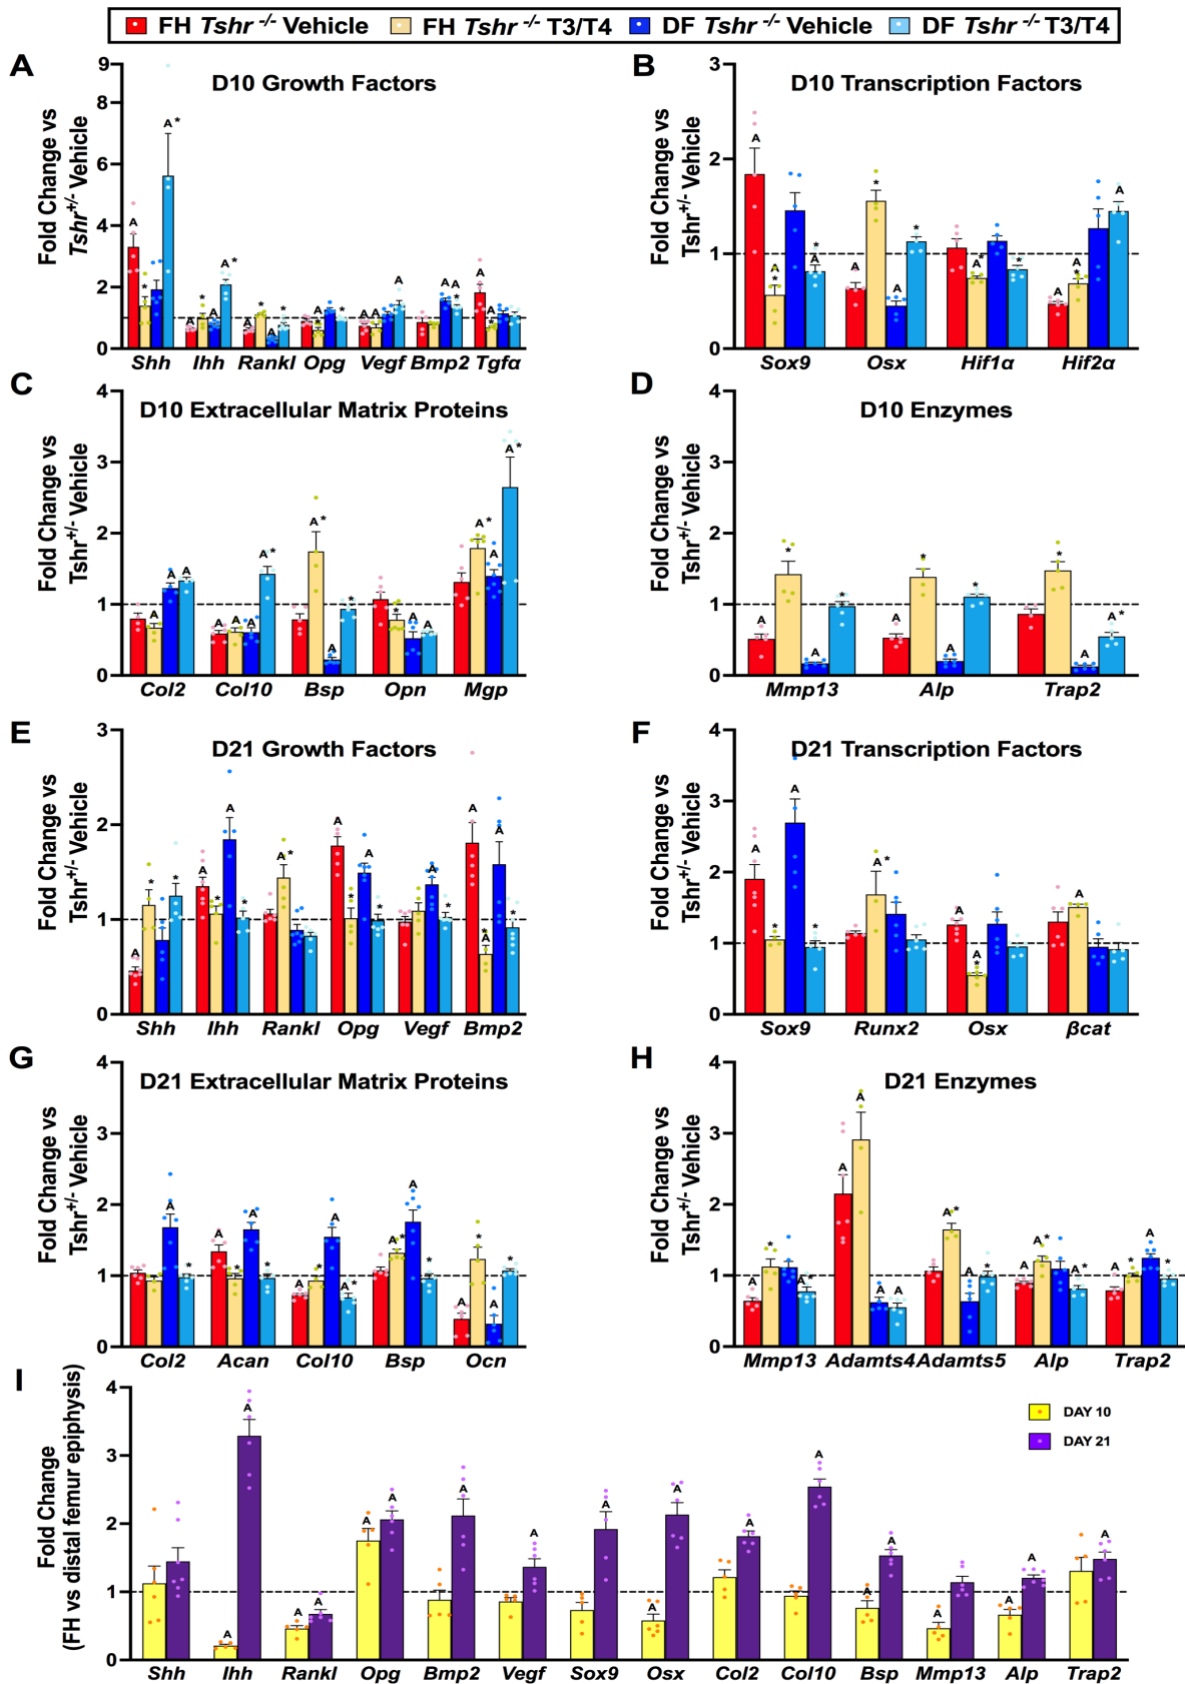

**Figure 3. TH dependent transcriptional differences at proximal and distal femur.**

(Panels A-G) Gene expression changes from Femur Head (FH) or Distal Femur (DF) between *Tshr*<sup>-/-</sup>

injected with vehicle, or T3/T4, plotted as fold-change relative to anatomical and stage matched region in euthyroid *Tshr*<sup>+/-</sup> injected with vehicle (dashed line). Day 10 samples (Panels A-D) were treated on days 5-9, while day 21 samples (Panels E-G) were treated on days 5-14. (Panel I) Fold change of mRNA expression at FH vs DF epiphysis in *Tshr*<sup>+/-</sup> on days 10 and 21. Statistics analyzed by T-test where A = P<0.05, \* = P<0.05 between T3/T4 treatment and Vehicle at FH or DF. (n=6) Sonic Hedgehog (*Shh*), Indian Hedgehog (*Ihh*), Rank ligand (*Rankl*), Osteoprotegerin (*Opg*), Vascular endothelial growth factor (*Vegf*), Bone morphogenetic protein 2 (*Bmp2*), Transforming growth factor  $\alpha$  (*Tgf\alpha*), SRY-Box Transcription Factor 9 (*Sox9*), Runt-Related Transcription Factor 2 (*Runx2*), Sp7 Transcription Factor (*Sp7/Osx*), Hypoxia Inducible Factor 1 $\alpha$  (*Hif1\alpha*), Hypoxia Inducible Factor 2 $\alpha$  (*Hif2\alpha*), Collagen Type II Alpha 1 (*Col2*), Collagen Type X Alpha 1 (*Col10*), Bone Sialoprotein II (*Bsp*), Osteopontin (*Opn*), Matrix Gla Protein (*Mgp*), Matrix Metalloproteinase 13 (*Mmp13*), Alkaline Phosphatase (*Alp*), Tartrate Resistant Acid Phosphatase (*Trap2*), Beta-Catenin (*\betacat*), Aggrecan (*Acan*), ADAM Metalloproteinase with Thrombospondin Type 1 Motif 4 (*Adamts4*), ADAM Metalloproteinase with Thrombospondin Type 1 Motif 5 (*Adamts5*)

234

### 235 **Spatio-temporal profile of protein expression in FH chondrocyte development**

236 To further characterize the molecular mechanisms that contribute to the  
237 development of the FH, we performed a time-course spatiotemporal analysis of proteins  
238 that report different stages of chondrocyte and osteoblast maturation by immunohistology  
239 on *Tshr*<sup>+/-</sup> on days 10, 17, and 21, and in *Tshr*<sup>-/-</sup> on day 17, when FH mineralization  
240 commences. Antibody fidelity was determined by spatial domains of expression in the  
241 proximal tibia of day 10 *Tshr*<sup>+/-</sup>, where active bone mineralization is underway, and occurs  
242 identically as in the distal femur.

243 We previously showed that expression of collagen proteins follows a linear  
244 progression of appearance whereby COL2 secretion by immature chondrocytes is  
245 followed by COL10 in pre-hypertrophic and hypertrophic chondrocytes, and COL1 in  
246 mineralizing osteoblasts during the second week of postnatal life at the distal femur and  
247 proximal tibia (Aghajanian et al., 2017; Xing et al., 2014). In the proximal FH, however,  
248 there was a delay in the expression of markers of chondrocyte differentiation as noted by  
249 the presence of COL2 in chondrocytes of day 10 FH, and subsequent replacement of  
250 COL2 with COL10 that persisted during active mineralization on day 17 (Figure 4A).

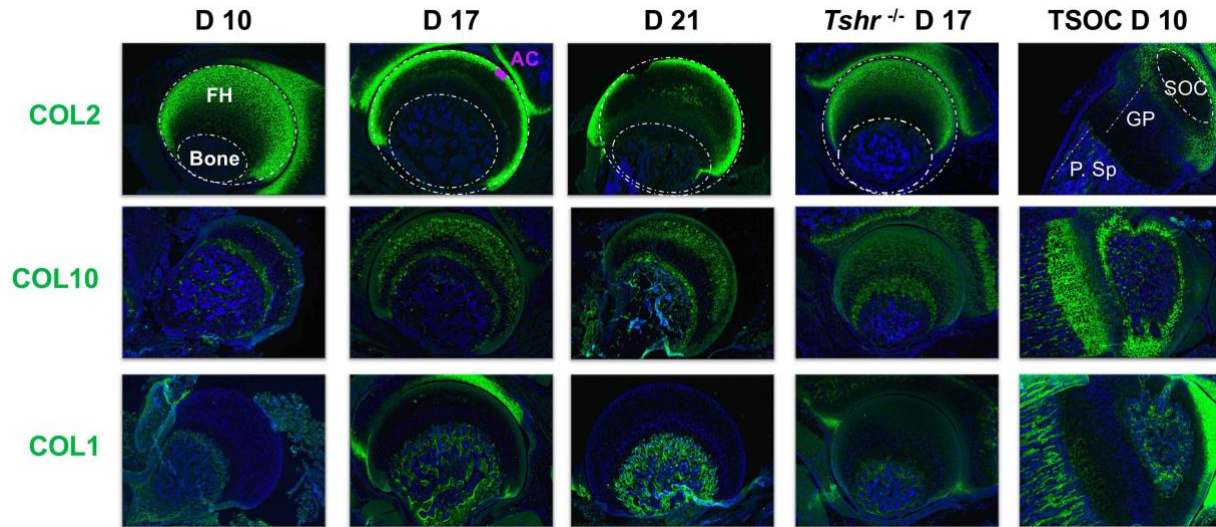

**Figure 4A. Immunohistochemical characterization of FH development.** Longitudinal sections of *Tshr*<sup>+/-</sup> mice were probed for protein expression in FH on Day 10, 17, 21, proximal tibia epiphysis on day 10, and FH of *Tshr*<sup>-/-</sup> on day 17 by immunofluorescence for collagens: COL2, COL10, COL1 (All green). Immunofluorescent images counterstained with DAPI (Blue). Abbreviations are reference for all Figure 4 panels; FH, femur head; AC, articular cartilage; SOC, secondary ossification center; GP, growth plate; P.Sp, primary spongiosa

251

252 Remarkably, in contrast to the SOC, COL1 expression was not detected during active  
253 mineralization in the FH. In agreement with delayed chondrocyte maturation at the FH of  
254 *Tshr*<sup>-/-</sup> mice, the expression domain of COL2 was expanded, while COL10 was decreased  
255 compared with stage matched controls (Figure 4A). Thus, the collagen expression profile  
256 is consistent with not only the delayed maturation at the FH but also mineralization  
257 occurring in a COL1 negative environment, unlike the SOCs at the distal end.

258

The progressive remodeling of collagens associated with distinct phases of  
259 chondrocyte maturation is principally achieved by enzymatic degradation. The key  
260 enzyme to preferentially target COL2 destruction is MMP13 (Inada et al., 2004).  
261 Immunostaining revealed that on day 10, MMP13 was largely expressed in a non-  
262 overlapping domain with COL2, while on days 17 and 21, MMP13 overlapped both COL2  
263 and COL10 in chondrocytes, but minimally overlapped COL1 in bone, and remained  
264 expressed in FH of *Tshr*<sup>-/-</sup> mice (Figure 4B). MMP9 degrades collagens expressed by  
265 more mature chondrocytes (Stickens et al., 2004), and while it was detected in bone  
266 tissue of all samples including strong expression at the SOC, it was not expressed in FH  
267 chondrocytes (Figure 4B).

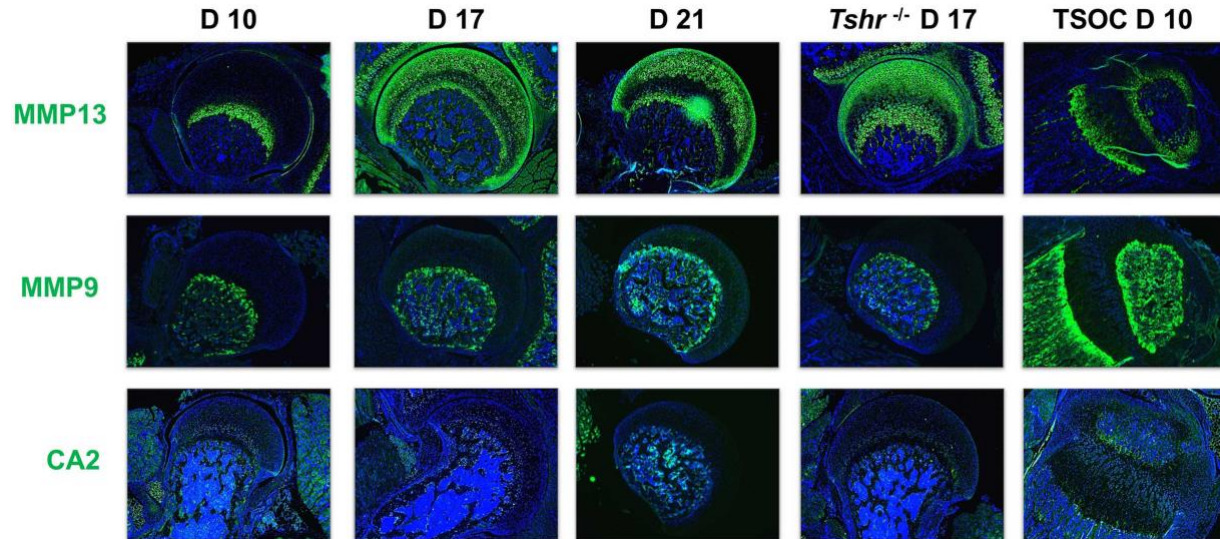

**Figure 4B. Immunohistochemical characterization of FH development.** Enzymes. Immunofluorescence staining of Enzymes, Matrix Metalloproteinase MMP13, MMP9, CA2 stained in green; counterstained with DAPI (blue).

268

269

270

271

272

273

274

275

276

277

278

Osteoblast mineralization is affected by a pH balanced extracellular matrix, the function of which is in part regulated by Carbonic Anhydrase II (CA2) (Adeva-Andany, Fernandez-Fernandez, Sanchez-Bello, Donapetry-Garcia, & Martinez-Rodriguez, 2015). While we found expression of CA2 in osteoblasts at the tibia SOC and in bone beneath the FH, we did not detect its expression in FH chondrocytes (Figure 4B). We also evaluated expression of non-collagenous extracellular matrix proteins involved in mineralization, BSP, OCN, DMP1, and OPN. They were all expressed highly in the SOC and bone below the FH at all time points analyzed, and only OCN was found in D10 FH. On days 17 and 21 OCN expression was lower in FH than in the bone matrix below the FH. While there was some positive signal for BSP in the FH on days 17 and

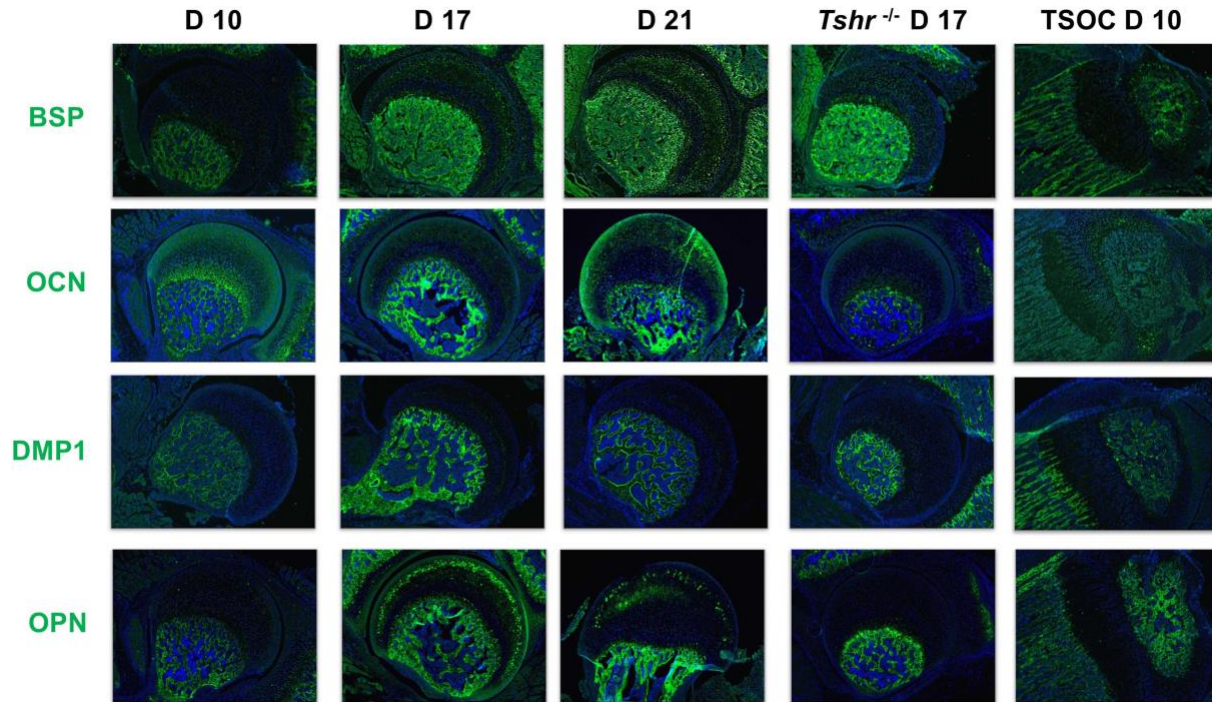

**Figure 4C. Immunohistochemical characterization of FH development.** Immunofluorescence staining of Non-collagenous extracellular matrix proteins. BSP, OCN, Dentin Matrix Protein 1 (DMP1), and OPN stained in green; samples were counterstained with DAPI (blue).

279

280 21, the signal intensity was much less than seen in the bone beneath the FH  
281 chondrocytes. DMP1 was not detected in the FH at any of the days evaluated, and OPN  
282 was expressed at high level in mineralizing chondrocytes of *Tshr*<sup>+/-</sup> control FH on day 17  
283 (Figure 4C). None of these mineralization factors were expressed in *Tshr*<sup>-/-</sup> FH  
284 chondrocytes. ALP activity was detected in bone and mineralizing regions of FH in  
285 *Tshr*<sup>+/-</sup> control mice at day 17 and 21 (Figure 4 Supplement1). These results reveal that  
286 some of the players involved in mineralization are differentially expressed in the FH  
287 versus SOC.

288

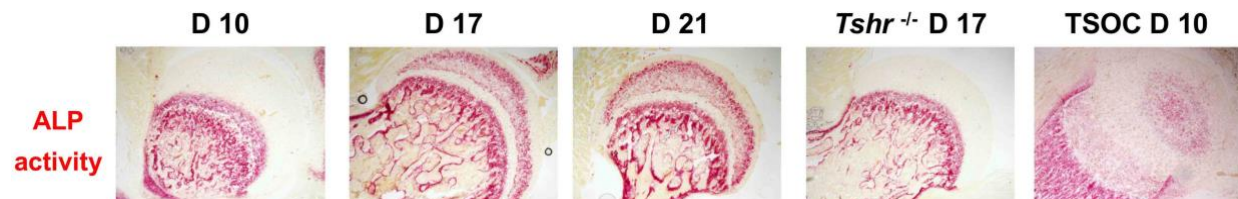

**Figure 4 Supplement 1. Alkaline Phosphatase (ALP) activity** in FH on Day (D)10, 17, 21, proximal tibia epiphysis on day 10 of *Tshr*<sup>+/-</sup> controls, and FH of *Tshr*<sup>-/-</sup> on day 17 FH (red stain).

289

290

291 We next determined if key transcription factors involved in chondrocyte/osteoblast  
292 differentiation (SOX9, RUNX2, OSX, DLX3, DLX5, HIF1 $\alpha$ ) are differentially expressed  
293 during mineralization of FH versus distal epiphysis. SOX9 signal was limited to  
294 chondrocytes in all regions examined. While SOX9 was not detected in hypertrophic  
295 chondrocytes in the tibia growth plate on day 10, it was present throughout the FH at all  
296 stages analyzed. RUNX2 was preferentially expressed in osteoblasts of the SOC and  
297 maturing chondrocytes at the tibia growth plate, as well as bone in the proximal femur,  
298 but not detected in FH chondrocytes until day 17 and thereafter. Both SOX9 and RUNX2

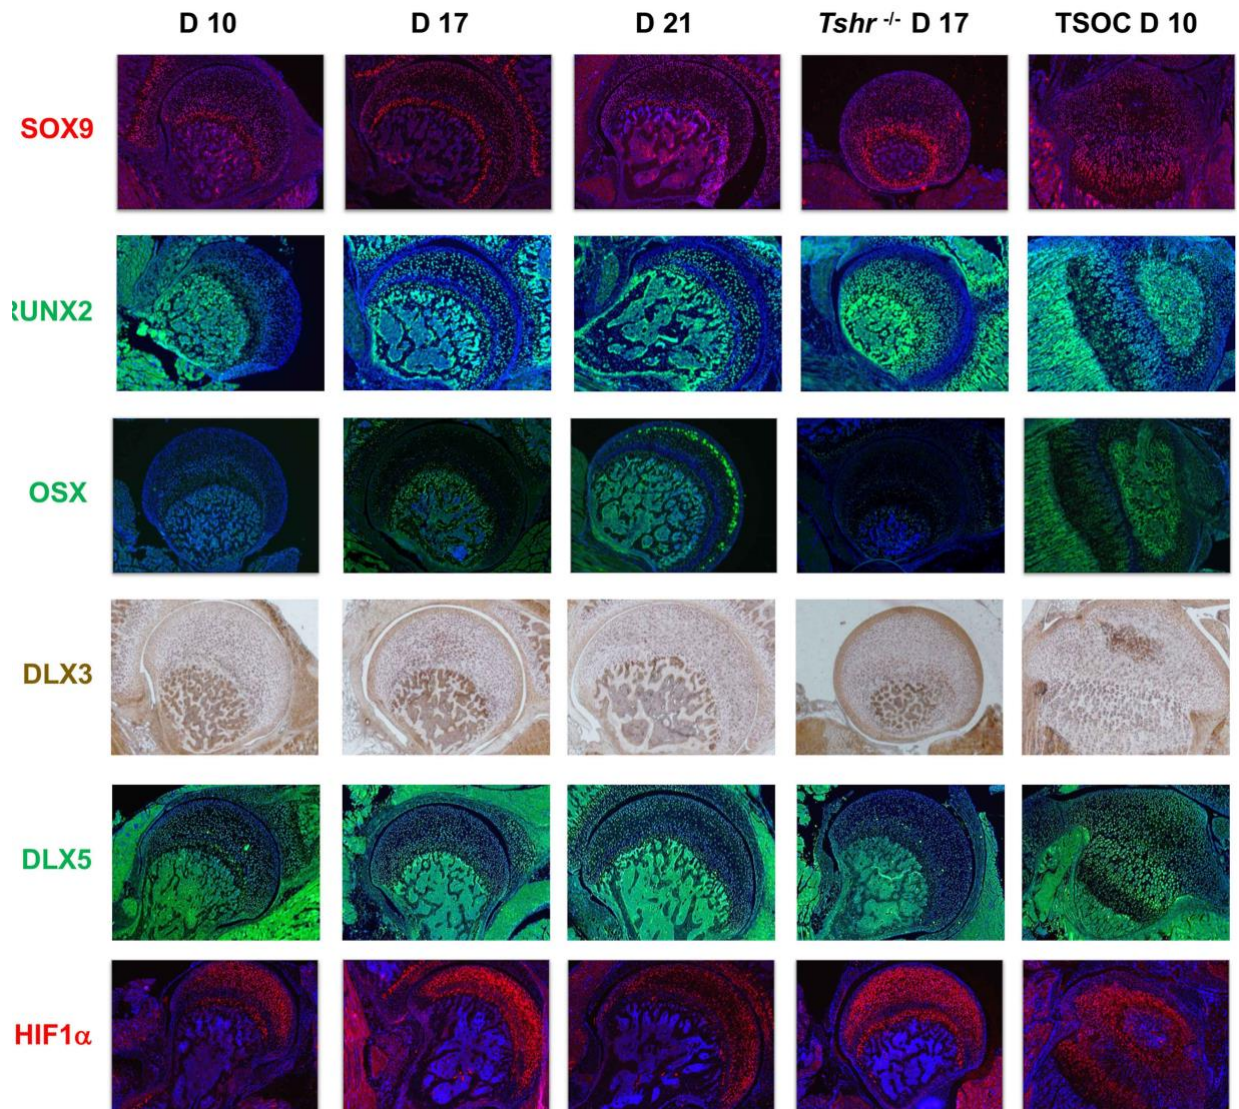

**Figure 4D. Immunohistochemical characterization of FH development.** Immunofluorescence staining of Transcription Factors. SOX9, HIF1 $\alpha$  are stained in red. RUNX2, OSX, and Distal-Less Homeobox 5 (DLX5) are stained in green. Immunofluorescence images counterstained with DAPI (blue). DLX3 stained in brown by colorimetric immunohistochemistry.

299

300 were expressed in the FH of *Tshr*<sup>-/-</sup> mice. Strong OSX expression was detected at the  
301 SOC and pre-hypertrophic chondrocytes of the tibia growth plate, as well as bone of  
302 proximal tibia, but minimally expressed in FH chondrocytes until day 21, and absent in  
303 *Tshr*<sup>-/-</sup> FH (Figure 4D). Both DLX3 and DLX5 were detected in mineralizing bone both  
304 proximally and distally. While DLX3 is expressed in FH chondrocytes prior to and during  
305 mineralization, DLX5 expression is weak or absent in the mineralizing region of the FH.  
306 HIF1 $\alpha$  was expressed in the differentiating chondrocytes of both proximal femur and tibia  
307 but to a reduced extent in mineralizing bone. These results reveal that unlike the distal  
308 femur where bone is formed by endochondral ossification, OSX likely plays a limited role  
309 in the initiation of FH chondrocyte mineralization.

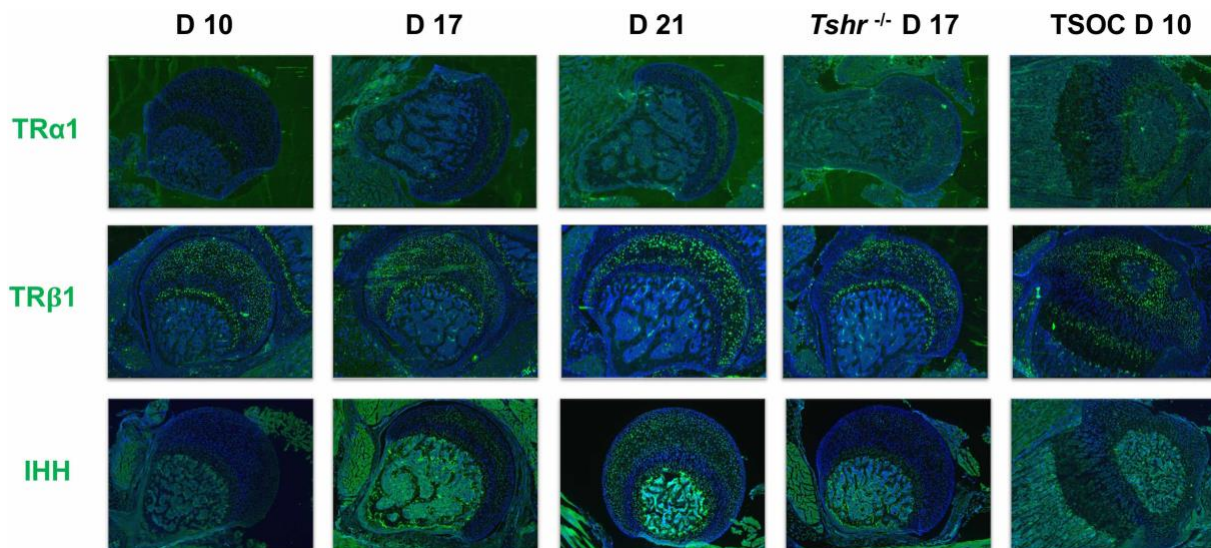

310 **Figure 4E. Immunohistochemical characterization of FH development.** Immunofluorescence  
311 staining of Thyroid Hormone response factors. Thyroid Hormone Receptor  $\alpha$ 1 (TR $\alpha$ 1), TR $\beta$ 1, IHH  
312 stained green. Counterstained with DAPI (blue)

311 Since TH is known to be critically involved in regulating chondrocyte maturation,  
312 we determined if delayed chondrocyte maturation in the FH can be explained on the basis  
313 of differences in TH receptor expression pattern in the FH versus SOC at the proximal  
314 tibia. Interestingly, we found that TR $\alpha$ 1 was minimally expressed in proximal FH  
315 chondrocytes on day 10 but was expressed in day 10 chondrocytes and pre-hypertrophic  
316 chondrocytes of the proximal tibia (Figure 4E). A notable gradual increase in expression  
317 was then observed on days 17 and 21, and reduced expression was seen in *Tshr*<sup>-/-</sup>. By  
318 comparison, TR $\beta$ 1 was expressed on day 10 FH in subarticular chondrocytes and in an  
319 expanded domain at the FH on days 17 and 21, as well as in chondrocytes surrounding



320 the SOC and in pre-hypertrophic chondrocytes of the growth plate in the proximal tibia  
321 (Figure 4E). Consistent with our identification of IHH as a direct target of TH action  
322 (Aghajanian et al., 2017; Xing et al., 2016), we found IHH expression in differentiating  
323 chondrocytes of both FH and tibia in a pattern that overlapped COL10 expression.

324

### 325 **Transcription factor regulation of chondroprogenitor differentiation**

326 Next, we aimed to determine how TH affects chondrocyte differentiation under  
327 controlled culture conditions, and how perturbation of master regulator transcription  
328 factors (RUNX2, OSX), and their co-regulators (DLX3, DLX5) affect this process in the  
329 absence or presence of TH. We therefore knocked down each of these transcription  
330 factors in the ATDC5 chondroprogenitor cell line by lentiviral delivery of shRNAs targeting  
331 each factor and included a non-specific/random control shRNA. First, we measured the  
332 response of ATDC5 cells transduced with control shRNA to a selected panel of genes via  
333 RT-qPCR after 3 days of treatment with vehicle or TH in the absence or presence of  
334 ascorbic acid (AA), a known inducer of chondrocyte differentiation (Altaf, Hering, Kazmi,  
335 Yoo, & Johnstone, 2006) (Figure 5A). Treatment with TH only resulted in significant  
336 repression of *Sox9* and *Col2*, as well as induction of *Col10*, and modulators of  
337 mineralization, *Bsp*, *Opn*, *Ocn*, *Alp*, and *Dmp1*. By contrast, addition of AA results in  
338 significant upregulation of *Runx2* and *Osx*, an effect that was also observed in AA/TH  
339 treated cultures. Interestingly, compared with AA alone, treatment with AA/TH repressed  
340 *Dlx3* and induced *Dlx5* expression (Figure 5A), as well as *Col10*, *Opn*, *Ocn*, *Alp* and  
341 *Dmp1*. These data indicate that TH in general promotes expression of genes involved in  
342 chondrocyte maturation and bone mineralization in chondroprogenitors, although TH  
343 effects vary in some instances depending on whether AA is present.

344 The consequence of knockdown of individual transcription factors on various  
345 targets is shown in Figure 5B-F. The knockdown of intended targets was validated by  
346 data shown in (Figure 5B, Figure 5 Supplement1). In the absence of TH and/or AA  
347 treatment, RUNX2, OSX, and DLX3 positively regulate markers of chondrocyte  
348 maturation, *Col10*, *Mmp13*, but seem to inhibit expression levels of markers of matrix  
349 mineralization, *Bsp*, *Opn*, *Dmp1*, and *Mgp*. Interestingly, expression levels of bone  
350 formation markers, *Ocn* and *Alp* are regulated in an antagonistic fashion by DLX3

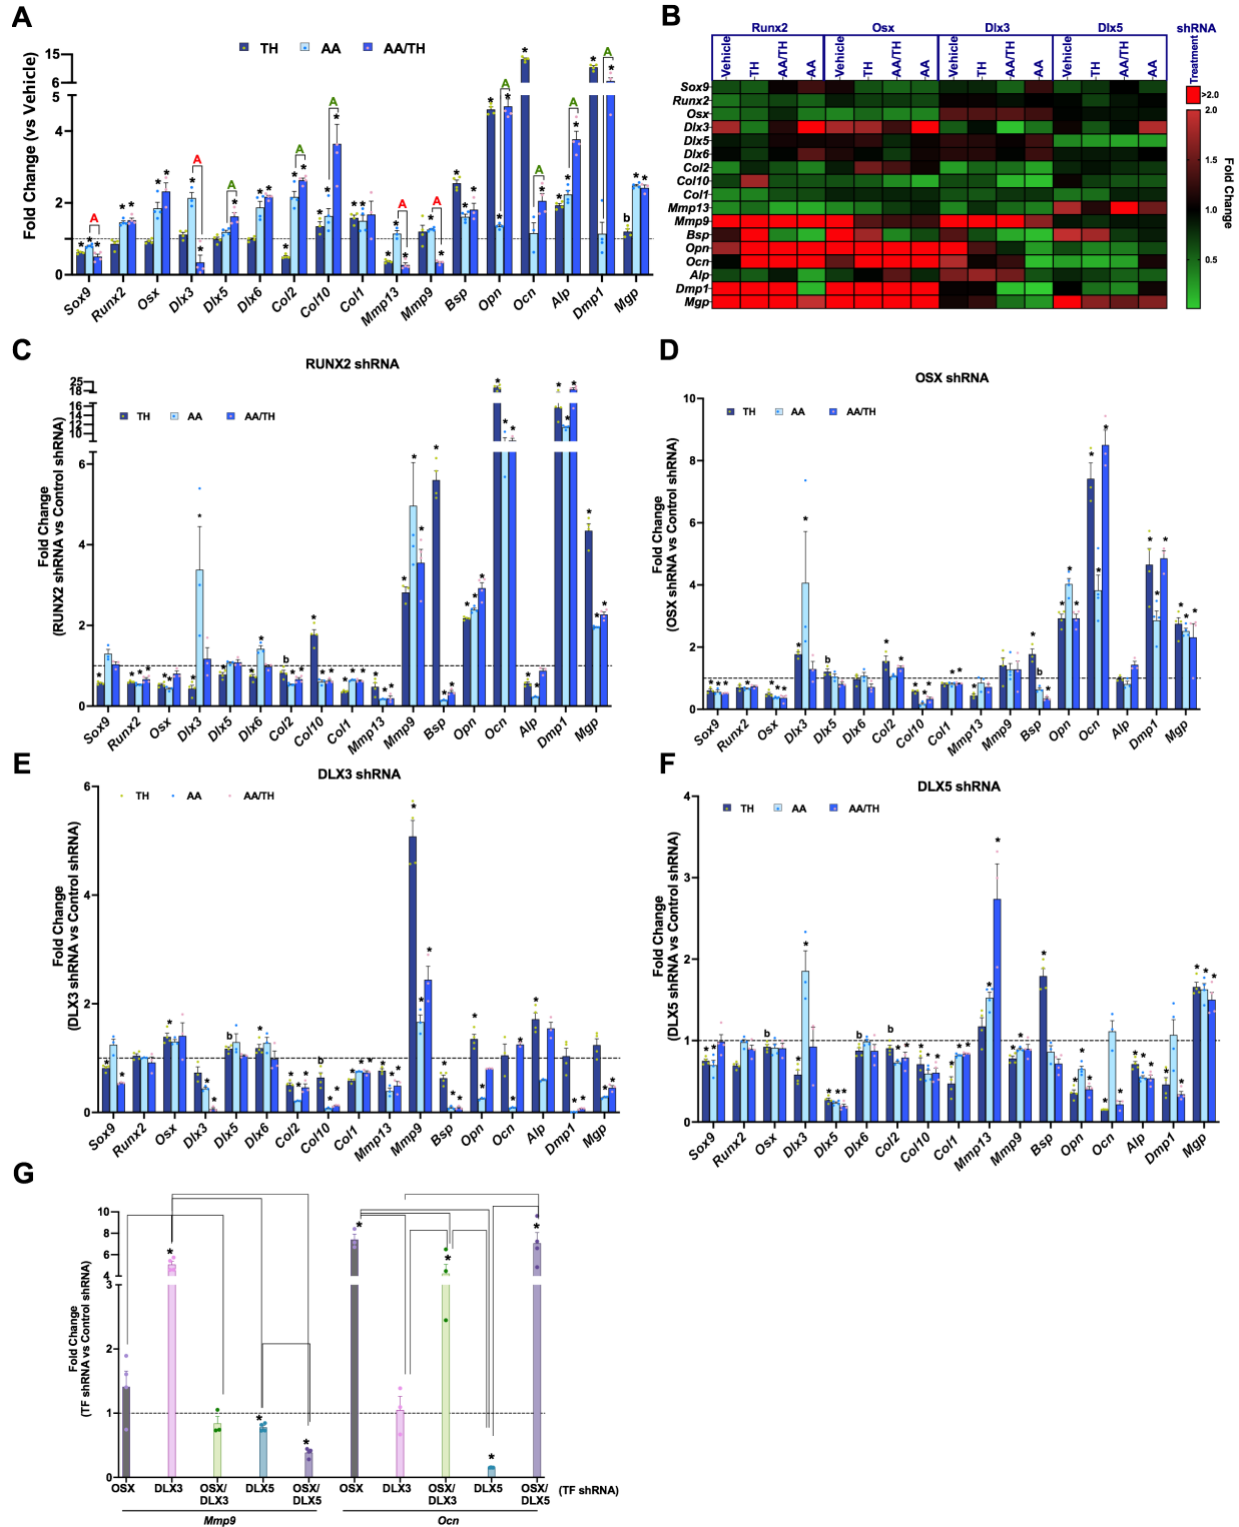

**Figure 5. TH and transcription factor regulation of chondroprogenitor genes.**

(Panels A-G) RT-qPCR on Day 3 for ATDC5 cell line represented as Fold Change for genes labeled on X-axis. (Panel A) ATDC5 with control shRNA following treatment with TH, AA or AA and TH (AA/TH). (Panel B) Heat map of all 17 genes analyzed in ATDC5 with shRNA for RUNX2, OSX, DLX3, DLX5. Graphed are the response to treatment with Vehicle, TH, AA or AA/TH vs control shRNA. Reduction in

expression signifies positive regulation (Green), while increased expression signifies negative regulation (Red). (Panels C-F) Individual transcription factor knockdown vs control shRNA following treatments vs vehicle. (Panel G) Comparison between groups knocked down for a given transcription factor combination on X-axis versus control shRNA in TH treatment at either *Mmp9* or *Ocn*. Statistics analyzed by T-test where \* =  $P < 0.05$  or less; b =  $P < 0.05-0.10$ , and in Panel G one way ANOVA where comparison bars indicate  $P < 0.05$  or less. (n=4).

352

353 (negative) and DLX5 (positive). As expected, knockdown of RUNX2 results in *Osx*  
354 downregulation, but not vice versa (Nakashima et al., 2002).

355

356

357

358

359

360

361

362

363

364

365

366

367

368

369

Next, we evaluated whether and how the four transcription factors alter TH's effect on regulation of chondrocyte differentiation by comparing changes elicited by shRNA for each transcription factor with control shRNA while in TH with and without AA. (Figure 5B-5F, Table 1). RUNX2 positively regulates expression of *Sox9*, *Osx*, *Dlx3* and *Dlx5* (Figure 5C), DLX3 negatively regulate expression levels of *Osx* and *Dlx6* (Figure 5E) in control cultures. In the presence of TH, OSX negatively regulates *Dlx3* expression (Figure 5D) while DLX5 positively regulates *Dlx3* expression (Figure 5F). While TH treatment alone represses *Col2* and induces *Col10* and *Col1*, in the presence of AA, TH promotes *Col2* and *Col10* expression, but not *Col1*. In TH treated cultures, *Col10* expression is positively regulated by OSX and DLX5 while RUNX2 is a negative regulator. All four transcription factors positively regulate *Col10* and *Col1* expression in AA/TH treated cultures. DLX3 and OSX exert positive and negative effects respectively on *Col2* expression in the presence of TH. These data suggest that TH promotes maturation of chondrocytes by inhibiting *Sox9* expression and promoting *Col10* expression, which is likely co-regulated by all transcription factors examined.

370

371

372

373

374

375

376

377

378

TH treatment represses *Mmp13* expression regardless of AA involvement (Figure 5A). In TH treated cultures, *Mmp13* is positively regulated by RUNX2, OSX and DLX3, while in AA/TH treated cultures, *Mmp13* is positively regulated by RUNX2 and DLX3 and negatively regulated by DLX5 (Figure 5C, 5E). *Mmp9* was repressed by TH but only in the presence of AA (Figure 5A). *Mmp9* is negatively regulated by RUNX2 and DLX3 in TH+AA treated cultures as well as in control cultures (Figure 5, Figure5 Supplement1). These results indicate that transcription factor regulation of *Mmp13* and *Mmp9* is the same in the presence or absence of TH, but RUNX2 and DLX3 impede TH mediated repression of *Mmp13*, while DLX5 antagonizes the DLX3 effect, and further promotes TH

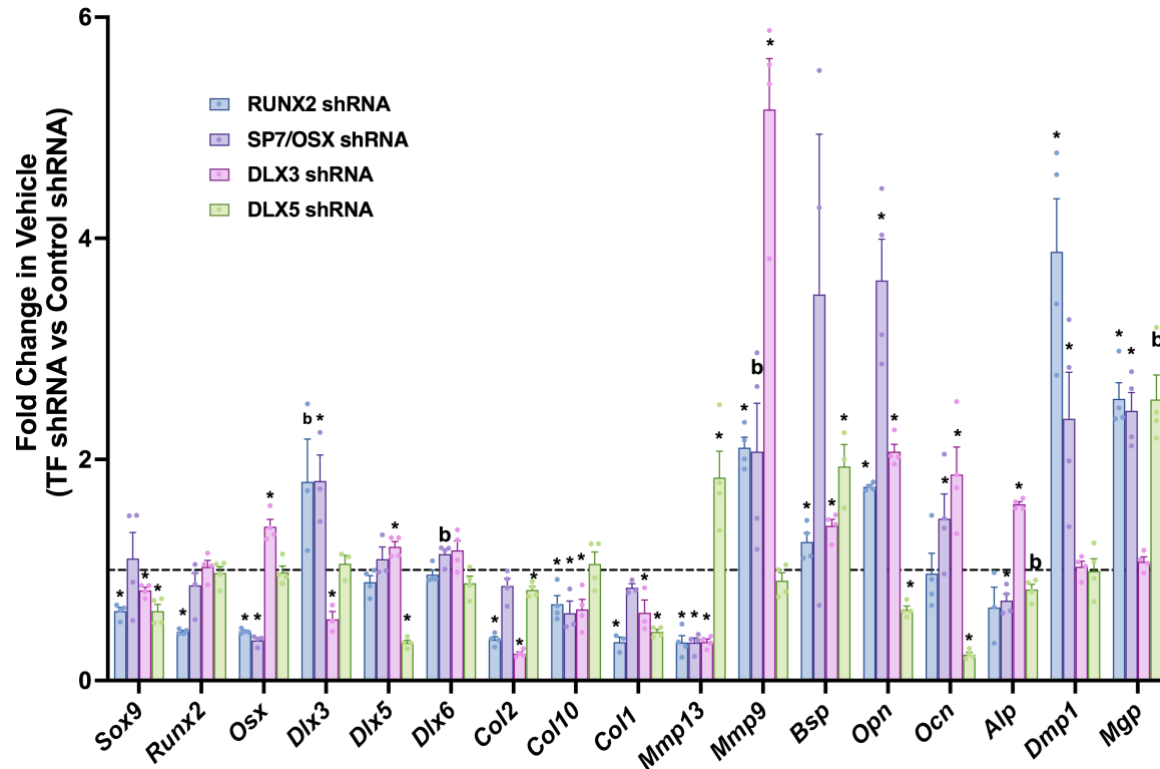

**Figure 5 Supplement 1. Effect of individual transcription factor knockdown in vehicle treatment.** RT-qPCR on Day 3 for ATDC5 transduced with shRNA for individual transcription factors RUNX2, SP7/OSX, DLX3, or DLX5 comparing fold changes at genes labeled on x-axis vs control shRNA in vehicle treatment condition. Statistics analyzed by T-test where \* =  $P < 0.05$  or less; b =  $P < 0.05-0.10$  ( $n=4$ ).

|              | Vehicle treatment |          | TH treatment |          | AA+TH treatment |          | AA treatment |          |
|--------------|-------------------|----------|--------------|----------|-----------------|----------|--------------|----------|
|              | Negative          | Positive | Negative     | Positive | Negative        | Positive | Negative     | Positive |
| <i>Sox9</i>  |                   | 2,3,5    |              | 2,3,5,7  |                 | 7        |              | 5,7      |
| <i>Runx2</i> |                   |          |              |          |                 |          |              | 7        |
| <i>Sp7</i>   | 3                 | 2        | 3            | 2        |                 |          |              | 2        |
| <i>Dlx3</i>  |                   | 7        | 7            | 2,5      |                 |          | 2,5,7        |          |
| <i>Dlx5</i>  | 3                 |          |              | 2        |                 |          |              |          |
| <i>Dlx6</i>  |                   |          | 2            | 3        |                 |          | 2            |          |
| <i>Col2</i>  |                   | 2,3      | 7            | 3        | 7               | 2,3,5    |              | 2,3,5    |
| <i>Col10</i> |                   | 2,3,7    | 2            | 5,7      |                 | 2,3,5,7  |              | 2,3,5,7  |
| <i>Col1</i>  |                   | 2,3,5    |              | 2,3,5    |                 | 2,3,5,7  |              | 2,3,5,7  |
| <i>Mmp13</i> | 5                 | 2,3,7    |              | 2,3,7    | 5               | 2,3      | 5            | 2,3      |
| <i>Mmp9</i>  | 2,3               |          | 2,3          | 5        | 2,3             |          | 2,3          | 5        |
| <i>Bsp</i>   | 2,3               |          | 2,5,7        | 3        |                 | 2,3,7    |              | 2,3      |
| <i>Opn</i>   | 2,3,7             | 5        | 2,3,7        | 5        | 2,7             | 5        | 2,7          | 3,5      |
| <i>Ocn</i>   | 3                 | 5        | 2,7          | 5        | 2,3,7           | 5        | 2,7          | 3        |
| <i>Alp</i>   | 3                 | 7        | 3            | 2        |                 | 5        |              | 2,5      |
| <i>Dmp1</i>  | 2,7               |          | 2,7          | 5        | 2,7             | 3,5      | 2,7          | 3        |
| <i>Mgp</i>   | 2,7               |          | 2,5,7        |          | 2,5,7           | 3        | 2,5,7        | 3        |

**Table 1.** Comparison of genes regulated by different transcription factors with a p-value  $< 0.05$  from Figure 5 panel B after treatment with Vehicle, TH, AA+TH or AA. “Negative” indicates knockdown of a given transcription results in a significant increase of gene in question, while “Positive” indicates the opposite. 2=Runx2; 3= DLX3; 5=DLX5; 7=SP7/OSX shRNAs.

380 mediated repression of *Mmp13*. Also, RUNX2 and DLX3 further promote the negative  
381 regulation of *Mmp9* by TH observed in the presence of AA.

382 TH induced expression of mineralization modulators *Bsp*, *Opn*, *Ocn*, *Alp*, and  
383 *Dmp1*, and in this condition, RUNX2 and OSX appear to negatively regulate *Bsp* and *Opn*  
384 expression, in collaboration with DLX5 at *Bsp* and DLX3 at *Opn* (Figure 5C-5F). It is  
385 interesting that in this condition DLX3 positively regulates *Bsp*, while DLX5 positively  
386 regulates *Opn*, which demonstrates their antagonism of key modulators of mineralization  
387 in the presence of TH. Similarly, in the presence of TH, *Alp* is positively regulated by  
388 RUNX2 and DLX5 and negatively by DLX3. However, in some instances, only one of  
389 these co-regulators are active. Such is the case at *Dmp1* which is negatively regulated  
390 by RUNX2 and OSX, yet positively regulated by DLX5. DLX5 also promotes TH mediated  
391 regulation of the *Ocn* gene, which shows the most robust response to TH treatment in  
392 chondrocytes. By contrast, AA effect on *Ocn* gene expression was mediated by DLX3.  
393 Overall, these data reveal a complex interplay of transcriptional circuits in ATDC5  
394 chondrocytes treated with TH and/or AA.

395 Based on the known interaction between OSX and DLX family members and the  
396 predicted DLX mediated recruitment of OSX to osteoblast enhancers during osteoblast  
397 specification (Hojo, Ohba, He, Lai, & McMahon, 2016), we determined DLX effects in the  
398 context of whether OSX is present or absent. Figure 5G shows that the knockdown effect  
399 of DLX3 or DLX5 on expression of *Mmp9* and *Ocn* in the presence of TH is differentially  
400 affected depending on whether OSX is present or absent. The inhibitory effect of DLX3  
401 on *Mmp9* expression is completely lost in the absence of OSX. However, DLX5 but not  
402 DLX3 mediates TH effects on *Ocn* expression in the presence of OSX, and the positive  
403 effect of DLX5 on *Ocn* expression is lost when OSX is absent. Overall, these results show  
404 that the contribution of gene regulation by co-regulators in response to TH is dependent  
405 on master regulators.

406

407

408

409

410

## 411 Discussion

412 The salient features of our study are as follows: 1) To our knowledge, this is the  
413 first demonstration that TH provides a fundamental input for the timely formation of the  
414 proximal femur, and in particular, for chondrocyte maturation and cartilage mineralization  
415 at the FH. 2) Overall, this study provides a mechanistic framework to understand the  
416 process of cartilage mineralization and how it differs from the endochondral bone  
417 formation process. 3) Our understanding of the regulatory molecules and cellular  
418 processes involved in ossification of cartilage during normal development may provide  
419 important clues to the understanding of components involved in pathological  
420 mineralization such as that seen in vascular tissues, and, thereby, provide an opportunity  
421 to identify strategies to diagnose and correct soft tissue calcifications.

422 Our initial characterization of the hip joint in hypothyroid *Tshr*<sup>-/-</sup> mutant animals led  
423 us to investigate the chronological events involved with FH maturation and mineralization.  
424 Intriguingly, although TH levels rise systemically, distal knee epiphyseal chondrocytes  
425 respond early and undergo endochondral ossification producing a secondary ossification  
426 center, while their proximal FH counterparts experience a delay in maturation, that is  
427 exacerbated in *Tshr*<sup>-/-</sup> mice. Our findings that TH injections rescue timely mineralization  
428 at the FH of *Tshr*<sup>-/-</sup> mice provides evidence that TH provides a direct input into this  
429 process. Moreover, the detection of TR $\alpha$ 1 and downstream genes in FH in euthyroid mice  
430 on day 17, when we observe the earliest onset of FH mineralization, suggests TH  
431 provides a crucial signal that initiates this process. Indeed, addition of TH to chondrogenic  
432 progenitors in culture results in the early induction of several positive and negative  
433 modulators of mineralization. Future studies are needed to identify the mechanisms for  
434 the delayed expression of TR $\alpha$ 1 at the FH compared to distal femur and proximal tibia.

435 In this study, we have identified interesting differences in the expression levels of  
436 extracellular matrix components, enzymes involved in matrix degradation and  
437 mineralization, growth factors as well as transcription factors between FH and distal femur  
438 during the period when active mineralization occurs in these two regions. While Safranin  
439 O and Toluidine Blue staining revealed evidence for the presence of cartilage in the  
440 mineralized region of FH at day 21, cartilage staining was absent in the mineralized tissue  
441 of distal femur at day 10 (Figure 2). Accordingly, while COL10 was abundantly present

442 in the mineralizing tissue of FH at day 21, COL10 was absent at the SOC of the distal  
443 epiphysis. By contrast, COL1 was abundantly present in the mineralized tissue of the  
444 distal epiphysis but was totally absent in the mineralized tissue of the FH. In terms of  
445 enzymes, MMP9, CA and TRAP2 were present in the mineralizing region of the distal  
446 epiphysis but absent in the FH. MMP9 was identified as a direct target of OSX (Yao et  
447 al., 2019). Accordingly, while we found strong OSX expression in the mineralizing tissue  
448 at the distal epiphysis, there was little or no signal for OSX in the mineralizing region of  
449 the FH. Similarly, DLX5 was strongly expressed in the mineralizing tissue of the distal  
450 epiphysis but not in the FH.

451 To understand the molecular mechanisms for TH regulation of chondrocyte  
452 maturation and bone formation, we evaluated the consequence of knockdown of master  
453 regulators of endochondral bone formation (RUNX2 and OSX) and their coregulators  
454 (DLX3 and DLX5) on TH-induced changes in expression levels of markers of  
455 chondrocytes and osteoblasts using ATDC5 chondrocytes. We also evaluated the role  
456 of these transcription factors in mediating TH effects in the presence of AA, a known  
457 inducer of chondrocyte differentiation (Altaf et al., 2006; Newton et al., 2012). Our data  
458 as summarized in Table 1 reveal that while RUNX2 is the main positive regulator of OSX,  
459 as expected, we identified DLX3 as a negative regulator of OSX. Interestingly, both  
460 COL10 and COL1 expression are positively regulated by all four transcription factors in  
461 AA or AA+TH treated cultures. While MMP9 expression was negatively regulated by  
462 RUNX2 and DLX3, its expression was positively regulated by DLX5. Furthermore, the  
463 negative effect of TH on MGP expression was mediated by RUNX2, DLX5 and OSX while  
464 the positive dramatic effects of TH on *Ocn* expression was mainly mediated by DLX5.  
465 Additionally, our data involving knockdown of OSX together with DLX3 or DLX5 (Figure  
466 5G) reveal that the positive effect of DLX5 on *Ocn* expression was dependent on whether  
467 or not OSX was present, thus revealing that interactions between OSX and DLX factors  
468 contribute to transcriptional regulation of bone matrix genes.

469 Based on the findings presented in this manuscript and the known role of TH in the  
470 regulation of endochondral bone formation, we propose the following model to explain the  
471 divergent contribution of chondrocytes to endochondral ossification at the distal femur  
472 versus direct mineralization of COL10 matrix by chondrocytes at the proximal FH (Figure

473 6). Despite the prolonged status of an articular chondrocyte-like immature state at the FH,  
 474 the initial shift towards differentiation is the same at both ends, whereby COL2 and ACAN  
 475 are degraded by MMP13 and ADAMTs and replaced by COL10 by mature chondrocytes.  
 476 In this mature state, COL10 mineralization is inhibited distally by TH mediated induction  
 477 of mineralization inhibitors such as DMP1 and MGP, allowing subsequent degradation of  
 478 COL10 by MMP9, clearing the way for mineralization of COL1 secreted by osteoblasts.  
 479 By contrast, at the proximal FH a RUNX2/DLX3 duo represses MMP9 expression,  
 480 protecting COL10 from degradation. RUNX2 also represses expression of mineralization  
 481 inhibitors, DMP1 and MGP, thus allowing progression of COL10 mineralization. Lack of  
 482 COL1 in the FH at the time of mineralization is consistent with the prediction that COL10  
 483 represents the major matrix component that is mineralized at this site. However, it  
 484 remains to be seen if there are other matrix components (e.g. OPN) that also contribute  
 485 to FH mineralization. During SOC formation at the distal femur, TH induces expression  
 486 of OPN, BSP and OCN that are primarily mediated by DLX5. Thus, we postulate that  
 487 while mature chondrocytes transdifferentiate into osteoblasts in

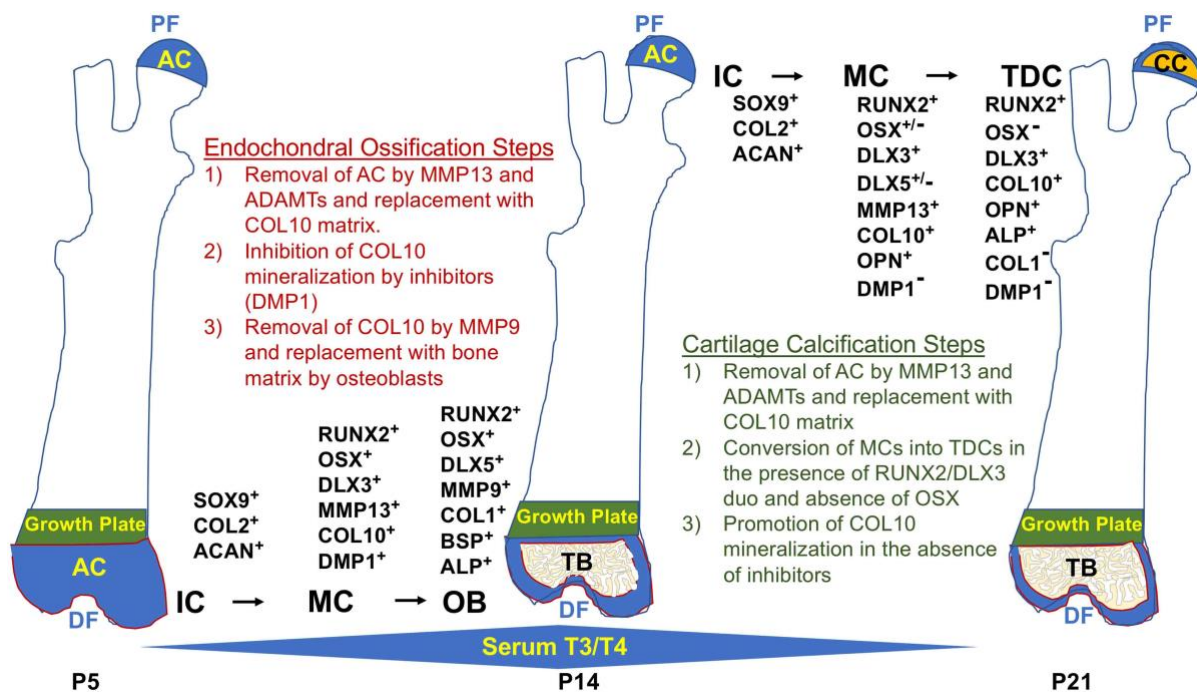

**Figure 6. Spatiotemporal model of proximal-distal femoral chondrocyte fate acquisition. Please see text in the discussion for explanation.**

Abbreviations: PF, Proximal Femur; AC, Articular Cartilage; CC, Calcified Cartilage; DF, Distal Femur; IC, Immature Chondrocyte; MC, Mature Chondrocyte; TDC, Terminally Differentiated Chondrocyte; OB, Osteoblast; TB, Trabecular Bone; P5-21, Postnatal Day; T3/T4, Thyroid Hormone.



489 the presence of an OSX and DLX5 duo, which produces bone matrix that promotes  
490 endochondral bone formation at the secondary ossification center of the distal femur,  
491 RUNX2 in the absence of OSX may interact with DLX3 to promote terminal differentiation  
492 of mature chondrocytes and subsequent cartilage mineralization at the FH.

493 Both master regulators of ossification, RUNX2 and OSX are involved in  
494 chondrocyte maturation in different areas that produce bone such as primary ossification  
495 centers, secondary ossification and growth plate. Although RUNX2 is upstream of OSX  
496 and both may be involved in regulation of genes that promote maturation (Artigas, Urena,  
497 Rodriguez-Carballo, Rosa, & Ventura, 2014), at the FH we find that OSX is not notably  
498 expressed. Chondrocyte specific knockout of OSX has been reported to result in  
499 expanded hypertrophic chondrocyte mineralization (Jing et al., 2014; Zhou et al., 2010),  
500 demonstrating that OSX is not required for chondrocyte mineralization, and its timely  
501 absence may even affect the fate of RUNX2+ hypertrophic chondrocytes. Incidentally,  
502 forced expression of RUNX2 is sufficient to increase the rate of chondrocyte maturation  
503 and induce ectopic chondrocyte mineralization in vivo (Takeda, Bonnamy, Owen, Ducy,  
504 & Karsenty, 2001). Also, OSX has been shown to be a positive regulator of COL1 and its  
505 interaction with DLX5 was shown to be critical for osteoblast specification (Hojo et al.,  
506 2016; Ortuno, Susperregui, Artigas, Rosa, & Ventura, 2013). Our findings support the  
507 model that an OSX/DLX5 duo contribute to transdifferentiation of chondrocytes to  
508 osteoblasts at the distal femur during endochondral bone formation, and the limited  
509 activity of OSX at the proximal femur may partly explain the difference in fates there.

510 We sought to understand why chondrocyte maturation at the proximal FH is  
511 delayed compared with the distal femur. One possibility is a difference in endothelial  
512 vasculature, but distal femur chondrocytes mature in response to TH prior to expression  
513 of VEGF (Aghajanian et al., 2017), limiting this option. We searched whether VEGF is  
514 expressed in the FH but did not detect it (data not shown), consistent with results reported  
515 by Cole et al. (2013). Therefore, the presence of HIF1 $\alpha$ + / VEGF- chondrocytes support  
516 the notion that HIF1 $\alpha$  does not regulate VEGF expression in this context, but is likely  
517 promoting collagen hydroxylation or contributing to chondrocyte metabolism (Bentovim,  
518 Amarilio, & Zelzer, 2012). Another possibility is that TH might regulate growth factor  
519 expression differentially in chondrocytes at the two ends of the femur, as shown by our

520 data on *Tgfa* (Figure 3A). It is equally possible that TH mediated activation or repression  
521 of signals from adjacent structures can affect the timing of maturation and mineralization  
522 at the proximal FH. Alternatively, TH activity might be subdued early at the FH. Indeed,  
523 we found that the thyroid hormone receptor,  $TR\alpha 1$ , was highly expressed distally on day  
524 10, but minimally at the FH in the same mice at postnatal day 10. In this regard, a  
525 complementary pattern was noted for the expression of IHH, a direct target of TH at both  
526 ends, supporting the likelihood that delayed chondrocyte development at the FH is  
527 caused by reduced TH activity. Addressing this question further will be worthwhile for  
528 future investigations.

529 The potential clinical relevance of our findings are as follows: it is known that  
530 physiological mineralization is necessary for the formation of skeletal tissues and is  
531 restricted to specific sites in skeletal tissues including cartilage, bone and teeth.  
532 Mineralization can also occur in an uncontrolled or pathological manner in many soft  
533 tissues including cardiovascular, kidney and articular cartilage leading to morbidity and  
534 mortality. Recent studies focused on the underlying mechanisms for vascular calcification  
535 have shown that components regulating physiological mineralization are also present in  
536 areas of pathological mineralization (Bourne, Wheeler-Jones, & Orriss, 2021;  
537 Tesfamariam, 2019), suggesting that mechanisms for pathological mineralization may be  
538 a recapitulation of what happens during normal development. Therefore, studies focused  
539 on the understanding of regulatory molecules and cellular processes involved in  
540 ossification of cartilage and bone tissues during normal development may provide  
541 important clues toward the understanding of components involved in pathological  
542 mineralization. Our further confirmation of the role of molecular signals and mechanisms  
543 that contribute to TH effects on cartilage versus bone mineralization at FH and distal  
544 femur, respectively, could lead to the development of novel strategies for prevention and  
545 treatment of osteoarthritis and other soft tissue calcification disorders.

546

547

548

549

550

## 551 **Materials and Methods**

### 552 Mouse model

553 We obtained the *Tshr<sup>hyt</sup>* mouse strain from Jackson Laboratories (Bar Harbor, ME).  
554 Animals were inbred and tail snip extracted DNA was genotyped for *Tshr* mutation by RT-  
555 qPCR. Mice were housed in standard housing conditions at the VA Loma Linda  
556 Healthcare System Veterinary Medical Unit (Loma Linda, CA). All procedures were  
557 approved by the Institutional Animal Care and Use Committees of the VA Loma Linda  
558 Healthcare System. At time of sacrifice, mice were anesthetized in isoflurane, then  
559 exposed to CO<sub>2</sub> prior to cervical dislocation, and bones dissected for further processing.  
560 For TH replacement experiments, genotyped mice were injected intraperitoneally with  
561 1µg T3 and 10µg thyroxine (T4) [Sigma-Aldrich], or an equal volume of vehicle (5mM  
562 NaOH) for 10 days (on days 5-14). Bones of mice studied on day 10 were injected on  
563 days 5-9 and sacrificed on day 10. *Tshr* mice do not show gender differences until 5 or  
564 6 weeks. Therefore, mice were pooled regardless of gender in all analysis.

565

### 566 X-ray

567 Femur X-rays of anesthetized hypothyroid *Tshr<sup>-/-</sup>* and euthyroid *Tshr<sup>+/-</sup>* mice were  
568 obtained from Faxitron Radiography system (Hologic, USA) at postnatal day 21 using  
569 20kV X-ray energy for 10 seconds.

570

### 571 Micro CT

572 Proximal femurs were evaluated by µCT (viva CT40; Scanco Medical, Switzerland) as  
573 described previously (Xing et al., 2014). Proximal femurs were isolated from postnatal  
574 day 21, fixed in 10% formalin overnight (ON), then washed and imaged in phosphate  
575 buffered saline (pH 7.4). Bones were scanned by X-ray at 55 kVp volts at a resolution of  
576 10.5 µM/slice. Images were reconstructed using the 2-D and 3-D image software  
577 provided by Scanco Viva-CT 40 instrument (Scanco, USA, Wayne, PA).

578

579

580

581

582 nanoCT

583 Proximal and distal femurs of *Tshr*<sup>+/-</sup> mice were scanned at postnatal day 10, 14, 17 and  
584 21 using a nano-CT at a voxel dimension of 0.3  $\mu$ m (VersaXRM-500; Xradia, Pleasanton,  
585 CA, USA). Images were captured using software provided by Xradia.

586

587 Histology

588 Mouse femurs were fixed in 10% formalin overnight, washed, decalcified in 10% EDTA  
589 (pH 7.4) at 4 C for 7 days with shaking and embedded in paraffin for sectioning.  
590 Longitudinal sections of the proximal and distal femur were stained with various stains  
591 using standard procedures.

592

593 Immunohistology

594 Longitudinal 5 $\mu$ m sections at regions of interest shown in figures were obtained by  
595 immunofluorescence following standard protocols. Both paraffin and cryosections were  
596 processed. Dissected bones were fixed for 3 days in either 10% formalin (paraffin) or 4%  
597 paraformaldehyde (cryosections) at 4°C, followed by one week of de-calcification in 20%  
598 EDTA in PBS buffer (pH 7.5). Cryosectioned samples were embedded and sectioned in  
599 OCT (FisherScientific, 23-730-571). Paraffin sections were deparaffinized in Histochoice  
600 clearing reagent (Amresco, H103-4L), gradually re-hydrated in ethanol through PBS, then  
601 permeabilized in 0.5% Triton X-100 (SIGMA, T-9284) for 15 minutes at RT, rinsed in PBS,  
602 followed by an antibody specific antigen retrieval approach (see Methods Table 1).  
603 Cryosections were processed identically except they were thawed to RT then started at  
604 the permeabilization step. Following antigen retrieval, tissue sections were blocked in  
605 2.5% serum and incubated in primary antibodies ON at RT. Commercial species-specific  
606 secondary antibodies were used (VECTOR labs, DI-1788 or DI-3088), and sections were  
607 counterstained with DAPI (Invitrogen, D1306). Colorimetric immunohistochemistry  
608 followed same steps as for immunofluorescence except 1) endogenous peroxidase was  
609 quenched with 3% H<sub>2</sub>O<sub>2</sub> prior to permeabilization 2) biotinylated goat anti-rabbit HRP  
610 secondary antibody was added at 1:200 (Vector BA-1000), followed by a 1:200 dilution  
611 of streptavidin-HRP (Vector: SA-5004), and detected by enzyme reaction with Betazoid  
612 DAB chromogen (BIOCARE BDB2004H). The Vector lab's mouse on mouse (MOM) kit

613 (BMK-2202) was used with mouse primary antibodies according to manufacturer  
614 instructions. Other VECTOR reagents used with MOM kit: Avidin/Biotin block, #SP-2001;  
615 Fluorescein Avidin #DCS A-2011.

616

### 617 Microscopy

618 Immunofluorescence images were obtained on a 5X dry objective on a Leica Digital  
619 Microscope DMI6000B with Leica Application Suite X software. Histological and  
620 colorimetric immunohistochemical images were obtained on an Olympus microscope with  
621 an Olympus DP72 camera with DP2-BSW software. All immunohistological results were  
622 processed together with consecutive sections that either received no primary antibody or  
623 species-specific IgG antibody. These were imaged at identical parameters as sections  
624 probed with antibodies.

625

### 626 ALP Histochemistry

627 Alp activity assay was performed on cryo-sectioned samples as described (Miao & Scutt,  
628 2002). Sections were warmed to room temperature, OCT compound washed out, then  
629 incubated in ALP buffer (6.055g Tris; 5.84g NaCl; 0.147g CaCl<sub>2</sub>•2H<sub>2</sub>O; 0.372g KCl;  
630 0.203g MgCl<sub>2</sub>•6H<sub>2</sub>O in 1L H<sub>2</sub>O pH 8.6) containing 1% magnesium chloride at 4°C O/N.  
631 Next day, samples were directly transferred to ALP buffer + Substrate (0.2 mg/mL  
632 naphthol AS-MX phosphate [Sigma-Aldrich, N6125-1G] and 0.4 mg/mL Fast Red violet  
633 LB [Sigma-Aldrich, F3381-1G]). Reaction was monitored, sections were rinsed with PBS,  
634 and imaged immediately. All samples received identical reaction time.

635

### 636 Cell culture

637 ATDC5 chondrocyte cell line was purchased from the American Type Culture Collection  
638 (Manassas, VA). Cells were maintained in DMEM-F12 medium containing 5% FBS,  
639 penicillin (100 U/mL), and streptomycin (100µg/mL) at 5% CO<sub>2</sub> in normoxic conditions at  
640 37°C. Cells were incubated in the presence of serum-free DMEM-F12 medium containing  
641 0.1% bovine serum albumin (BSA) and antibiotics for 24 h prior to treatment with 10ng/mL  
642 T3 (Sigma-Aldrich), 50 µg/mL Ascorbic Acid and/or 10mM β-Glycerol phosphate (BG).  
643 Vehicle control indicate cells treated with BG only. shRNA knockdown was achieved by

644 transduction of Mission Lentiviral particles (Millipore, Sigma): Control shRNA-  
645 Cat#SHC002V; RUNX2 NM\_009820, Cat#TRCN0000095590; DLX3 NM\_010055,  
646 Cat#TRCN0000430532; DLX5 NM\_010056.2 Cat#TRCN0000428940; Sp7  
647 NM\_130458 Cat#TRCN0000423959

648

649 *Real Time quantitative PCR (RTqPCR)*

650 RNA was extracted from epiphyseal chondrocytes or ATDC5 cells in TRI reagent  
651 (Molecular Research Center INC, TR118) according to manufacturer instructions, and  
652 purified on silica columns with E.Z.N.A. Total RNA Kit I (Omega BIO-TEK, R6834-02).  
653 Total RNA was reverse transcribed to cDNA with oligo(dT)<sub>12-18</sub> and Superscript IV  
654 Reverse transcriptase (Invitrogen, 18091050). A final concentration of 0.133ng/ $\mu$ L was  
655 used per real time PCR reaction with InVitrogen SYBR green (ThermoFisher, 4309155)  
656 and processed on a ViiA 7 RT-PCR system. All reactions were standardized with Peptidyl  
657 prolyl isomerase A (PPIA) primers. Primer sequences used for RT-qPCR are listed in  
658 Methods Table 2. Fold changes were calculated by the Delta Ct method, and statistics  
659 analyzed by T-test (processed on Microsoft Excel 365) or one-way ANOVA (processed  
660 on Graphpad Prism9). Error bars in all graphs indicate +/- Standard Error of Mean (SEM).

661

662 **Author contributions.** SM conceived and directed the project. SM, PA and GG  
663 designed the experiments and interpreted the data. Experiments were performed by PA,  
664 GG, SP and DL. Data analyses were performed by GG, SP and DL. SM and GG wrote  
665 the manuscript, and all authors reviewed the manuscript. SM and GG accept  
666 responsibility for the integrity of data analysis.

667

668 **Acknowledgements.** This work was supported by National Institutes of Health Grant  
669 R01 AR048139 (SM), R21 AG062866 (SM) and Veterans Administration BLR&D Grant  
670 BX005263 (SM). SM is a recipient of Senior Research Career Scientist Award from  
671 Veterans Administration. The authors thank Veterans Administration for providing  
672 facilities to perform the work. Expert technical assistance by Catrina Godwin, Fern  
673 Baedyananda, Jasmine Lau, Subhashri Das, Heather Watt and Nancy Lowen are greatly  
674 acknowledged.

675 **References**

- 676 Adeva-Andany, M. M., Fernandez-Fernandez, C., Sanchez-Bello, R., Donapetry-Garcia,  
677 C., & Martinez-Rodriguez, J. (2015). The role of carbonic anhydrase in the  
678 pathogenesis of vascular calcification in humans. *Atherosclerosis*, *241*(1), 183-  
679 191. doi:10.1016/j.atherosclerosis.2015.05.012
- 680 Aghajanian, P., Xing, W., Cheng, S., & Mohan, S. (2017). Epiphyseal bone formation  
681 occurs via thyroid hormone regulation of chondrocyte to osteoblast  
682 transdifferentiation. *Sci Rep*, *7*(1), 10432. doi:10.1038/s41598-017-11050-1
- 683 Altaf, F. M., Hering, T. M., Kazmi, N. H., Yoo, J. U., & Johnstone, B. (2006). Ascorbate-  
684 enhanced chondrogenesis of ATDC5 cells. *Eur Cell Mater*, *12*, 64-69; discussion  
685 69-70. doi:10.22203/ecm.v012a08
- 686 Artigas, N., Urena, C., Rodriguez-Carballo, E., Rosa, J. L., & Ventura, F. (2014). Mitogen-  
687 activated protein kinase (MAPK)-regulated interactions between Osterix and  
688 Runx2 are critical for the transcriptional osteogenic program. *J Biol Chem*, *289*(39),  
689 27105-27117. doi:10.1074/jbc.M114.576793
- 690 Bassett, J. H., Williams, A. J., Murphy, E., Boyde, A., Howell, P. G., Swinhoe, R., . . .  
691 Williams, G. R. (2008). A lack of thyroid hormones rather than excess thyrotropin  
692 causes abnormal skeletal development in hypothyroidism. *Mol Endocrinol*, *22*(2),  
693 501-512. doi:10.1210/me.2007-0221
- 694 Bentovim, L., Amarilio, R., & Zelzer, E. (2012). HIF1alpha is a central regulator of collagen  
695 hydroxylation and secretion under hypoxia during bone development.  
696 *Development*, *139*(23), 4473-4483. doi:10.1242/dev.083881
- 697 Bourne, L. E., Wheeler-Jones, C. P., & Orriss, I. R. (2021). Regulation of mineralisation  
698 in bone and vascular tissue: a comparative review. *J Endocrinol*, *248*(2), R51-R65.  
699 doi:10.1530/JOE-20-0428
- 700 Cheng, S., Aghajanian, P., Pourteymoor, S., Alarcon, C., & Mohan, S. (2016). Prolyl  
701 Hydroxylase Domain-Containing Protein 2 (Phd2) Regulates Chondrocyte  
702 Differentiation and Secondary Ossification in Mice. *Sci Rep*, *6*, 35748.  
703 doi:10.1038/srep35748

- 704 Cheng, S., Pourteymoor, S., Alarcon, C., & Mohan, S. (2017). Conditional Deletion of the  
705 Phd2 Gene in Articular Chondrocytes Accelerates Differentiation and Reduces  
706 Articular Cartilage Thickness. *Sci Rep*, 7, 45408. doi:10.1038/srep45408
- 707 Cole, H. A., Yuasa, M., Hawley, G., Cates, J. M., Nyman, J. S., & Schoenecker, J. G.  
708 (2013). Differential development of the distal and proximal femoral epiphysis and  
709 physis in mice. *Bone*, 52(1), 337-346. doi:10.1016/j.bone.2012.10.011
- 710 Gogakos, A. I., Duncan Bassett, J. H., & Williams, G. R. (2010). Thyroid and bone. *Arch*  
711 *Biochem Biophys*, 503(1), 129-136. doi:10.1016/j.abb.2010.06.021
- 712 Hojo, H., Ohba, S., He, X., Lai, L. P., & McMahon, A. P. (2016). Sp7/Osterix Is Restricted  
713 to Bone-Forming Vertebrates where It Acts as a Dlx Co-factor in Osteoblast  
714 Specification. *Dev Cell*, 37(3), 238-253. doi:10.1016/j.devcel.2016.04.002
- 715 Inada, M., Wang, Y., Byrne, M. H., Rahman, M. U., Miyaura, C., López-Otín, C., & Krane,  
716 S. M. (2004). Critical roles for collagenase-3 (Mmp13) in development of growth  
717 plate cartilage and in endochondral ossification. *Proc Natl Acad Sci U S A*, 101(49),  
718 17192-17197. doi:10.1073/pnas.0407788101
- 719 Jing, J., Hinton, R. J., Jing, Y., Liu, Y., Zhou, X., & Feng, J. Q. (2014). Osterix couples  
720 chondrogenesis and osteogenesis in post-natal condylar growth. *J Dent Res*,  
721 93(10), 1014-1021. doi:10.1177/0022034514549379
- 722 Kim, H. Y., & Mohan, S. (2013). Role and Mechanisms of Actions of Thyroid Hormone on  
723 the Skeletal Development. *Bone Res*, 1(2), 146-161. doi:10.4248/BR201302004
- 724 Li, J., & Dong, S. (2016). The Signaling Pathways Involved in Chondrocyte Differentiation  
725 and Hypertrophic Differentiation. *Stem Cells Int*, 2016, 2470351.  
726 doi:10.1155/2016/2470351
- 727 Mackie, E. J., Tatarczuch, L., & Mirams, M. (2011). The skeleton: a multi-functional  
728 complex organ: the growth plate chondrocyte and endochondral ossification. *J*  
729 *Endocrinol*, 211(2), 109-121. doi:10.1530/JOE-11-0048
- 730 Miao, D., & Scutt, A. (2002). Histochemical localization of alkaline phosphatase activity in  
731 decalcified bone and cartilage. *J Histochem Cytochem*, 50(3), 333-340.  
732 doi:10.1177/002215540205000305
- 733 Mohan, S., Richman, C., Guo, R., Amaar, Y., Donahue, L. R., Wergedal, J., & Baylink, D.  
734 J. (2003). Insulin-like growth factor regulates peak bone mineral density in mice by



- 735 both growth hormone-dependent and -independent mechanisms. *Endocrinology*,  
736 144(3), 929-936. doi:10.1210/en.2002-220948
- 737 Nakashima, K., Zhou, X., Kunkel, G., Zhang, Z., Deng, J. M., Behringer, R. R., & de  
738 Crombrughe, B. (2002). The novel zinc finger-containing transcription factor  
739 osterix is required for osteoblast differentiation and bone formation. *Cell*, 108(1),  
740 17-29. doi:10.1016/s0092-8674(01)00622-5
- 741 Newton, P. T., Staines, K. A., Spevak, L., Boskey, A. L., Teixeira, C. C., Macrae, V. E., .  
742 . . Farquharson, C. (2012). Chondrogenic ATDC5 cells: an optimised model for  
743 rapid and physiological matrix mineralisation. *Int J Mol Med*, 30(5), 1187-1193.  
744 doi:10.3892/ijmm.2012.1114
- 745 Ortuno, M. J., Susperregui, A. R., Artigas, N., Rosa, J. L., & Ventura, F. (2013). Osterix  
746 induces Col1a1 gene expression through binding to Sp1 sites in the bone  
747 enhancer and proximal promoter regions. *Bone*, 52(2), 548-556.  
748 doi:10.1016/j.bone.2012.11.007
- 749 Patton, J. T., & Kaufman, M. H. (1995). The timing of ossification of the limb bones, and  
750 growth rates of various long bones of the fore and hind limbs of the prenatal and  
751 early postnatal laboratory mouse. *J Anat*, 186 ( Pt 1)(Pt 1), 175-185.
- 752 Schipani, E., Ryan, H. E., Didrickson, S., Kobayashi, T., Knight, M., & Johnson, R. S.  
753 (2001). Hypoxia in cartilage: HIF-1alpha is essential for chondrocyte growth arrest  
754 and survival. *Genes Dev*, 15(21), 2865-2876. doi:10.1101/gad.934301
- 755 Stickens, D., Behonick, D. J., Ortega, N., Heyer, B., Hartenstein, B., Yu, Y., . . . Werb, Z.  
756 (2004). Altered endochondral bone development in matrix metalloproteinase 13-  
757 deficient mice. *Development*, 131(23), 5883-5895. doi:10.1242/dev.01461
- 758 Takarada, T., Nakazato, R., Tsuchikane, A., Fujikawa, K., Iezaki, T., Yoneda, Y., & Hinoi,  
759 E. (2016). Genetic analysis of Runx2 function during intramembranous  
760 ossification. *Development*, 143(2), 211-218. doi:10.1242/dev.128793
- 761 Takeda, S., Bonnamy, J. P., Owen, M. J., Ducy, P., & Karsenty, G. (2001). Continuous  
762 expression of Cbfa1 in nonhypertrophic chondrocytes uncovers its ability to induce  
763 hypertrophic chondrocyte differentiation and partially rescues Cbfa1-deficient  
764 mice. *Genes Dev*, 15(4), 467-481. doi:10.1101/gad.845101

- 765 Tesfamariam, B. (2019). Involvement of Vitamin K-Dependent Proteins in Vascular  
766 Calcification. *J Cardiovasc Pharmacol Ther*, 24(4), 323-333.  
767 doi:10.1177/1074248419838501
- 768 Wang, L., Shao, Y. Y., & Ballock, R. T. (2010). Thyroid hormone-mediated growth and  
769 differentiation of growth plate chondrocytes involves IGF-1 modulation of beta-  
770 catenin signaling. *J Bone Miner Res*, 25(5), 1138-1146. doi:10.1002/jbmr.5
- 771 Wang, Y., Nishida, S., Sakata, T., Elalieh, H. Z., Chang, W., Halloran, B. P., . . . Bikle, D.  
772 D. (2006). Insulin-like growth factor-I is essential for embryonic bone development.  
773 *Endocrinology*, 147(10), 4753-4761. doi:10.1210/en.2006-0196
- 774 Xing, W., Aghajanian, P., Goodluck, H., Kesavan, C., Cheng, S., Pourteymoor, S., . . .  
775 Mohan, S. (2016). Thyroid hormone receptor-beta1 signaling is critically involved  
776 in regulating secondary ossification via promoting transcription of the *Ihh* gene in  
777 the epiphysis. *Am J Physiol Endocrinol Metab*, 310(10), E846-854.  
778 doi:10.1152/ajpendo.00541.2015
- 779 Xing, W., Cheng, S., Wergedal, J., & Mohan, S. (2014). Epiphyseal chondrocyte  
780 secondary ossification centers require thyroid hormone activation of Indian  
781 hedgehog and osterix signaling. *J Bone Miner Res*, 29(10), 2262-2275.  
782 doi:10.1002/jbmr.2256
- 783 Yao, B., Wang, J., Qu, S., Liu, Y., Jin, Y., Lu, J., . . . Ma, C. (2019). Upregulated osterix  
784 promotes invasion and bone metastasis and predicts for a poor prognosis in breast  
785 cancer. *Cell Death Dis*, 10(1), 28. doi:10.1038/s41419-018-1269-3
- 786 Yellowley, C. E., & Genetos, D. C. (2019). Hypoxia Signaling in the Skeleton: Implications  
787 for Bone Health. *Curr Osteoporos Rep*, 17(1), 26-35. doi:10.1007/s11914-019-  
788 00500-6
- 789 Zhou, X., Zhang, Z., Feng, J. Q., Dusevich, V. M., Sinha, K., Zhang, H., . . . de  
790 Crombrughe, B. (2010). Multiple functions of Osterix are required for bone growth  
791 and homeostasis in postnatal mice. *Proc Natl Acad Sci U S A*, 107(29), 12919-  
792 12924. doi:10.1073/pnas.0912855107
- 793  
794  
795

796 **Methods Table 1. Antibodies used in this study**

|                                | <b>Vendor</b>            | <b>Catalog#</b>        | <b>dilution</b> | <b>Antigen Retrieval</b> |
|--------------------------------|--------------------------|------------------------|-----------------|--------------------------|
| <b>COL2</b>                    | DSHB                     | CIIC1                  | 1:10            | HD                       |
| <b>COL10</b>                   | Abcam                    | ab58632                | 1:100           | HD                       |
| <b>COL1</b>                    | Novus Biologicals        | NB600-408              | 1:100           | HD                       |
| <b>MMP13</b>                   | Novus Biologicals        | NBP1-45723             | 1:200           | HD                       |
| <b>MMP9</b>                    | Abcam                    | ab388898               | 1:100           | L                        |
| <b>CA2</b>                     | GeneTex                  | GTX53908               | 1:100           | HD                       |
| <b>BSP</b>                     | Dr. Renny Franceschi     | University of Michigan | 1:100           | HD                       |
| <b>OCN</b>                     | Abcam                    | ab93876                | 1:250           | HD                       |
| <b>DMP1</b>                    | Novus Biologicals        | NBP1-89484             | 1:100           | HD                       |
| <b>OPN</b>                     | Kerafast                 | ENH094-FP              | 1:300           | HD                       |
| <b>SOX9</b>                    | Sigma-Aldrich            | AB5535                 | 1:100           | S                        |
| <b>RUNX2</b>                   | Abcam                    | ab192256               | 1:250           | S                        |
| <b>OSX</b>                     | Santa Cruz Biotechnology | sc-22536-r             | 1:50            | HD                       |
| <b>DLX3</b>                    | Abcam                    | ab64953                | 1:50            | HD                       |
| <b>DLX5</b>                    | Abcam                    | ab109737               | 1:100           | S                        |
| <b>HIF1<math>\alpha</math></b> | Novus Biologicals        | NB-100134              | 1:50            | S                        |
| <b>TR<math>\alpha</math>1</b>  | Santa Cruz Biotechnology | sc-10819               | 1:50            | S                        |
| <b>TR<math>\beta</math>1</b>   | Santa Cruz Biotechnology | sc-10822               | 1:200           | HD                       |
| <b>IHH</b>                     | Abcam                    | ab39634                | 1:50            | S                        |

**Antigen Retrieval with**

**HD = 2mg/mL Hyaluronidase (Sigma Aldrich) in PBS at 37°C for 45 minutes**

**S = 10mM Sodium Citrate w/2mM EDTA and 0.05% Tween-20 (pH 6.0) at 95°C for 6 minutes**

**L = 10mM Sodium Citrate w/2mM EDTA and 0.05% Tween-20 (pH 6.0) at 60°C for 72 hours**

797

798

799

800

801

802

803

804

805

806

807 **Methods Table 2. Real Time quantitative PCR Primers used in this study**

| <b>Gene</b>                    |   | <b>Primer Sequences</b>   |
|--------------------------------|---|---------------------------|
| <i>Adamts4</i>                 | F | CAGTGCCCGATTTCATCACTGA    |
|                                | R | GAGTCAGGACCGAAGGTCAG      |
| <i>Adamts5</i>                 | F | CGAAGAGCACTACGATGCAGC     |
|                                | R | GCATGGAGGCCATCATCTTCAAT   |
| <i>Acan</i>                    | F | GACCAGGAAGGGAGGAGTAG      |
|                                | F | CAGCCGAGAAATGACACC        |
| <i>Alp</i>                     | R | ATGGTAACGGGCCTGGCTACA     |
|                                | F | AGTTCTGCTCATGGACGCCGT     |
| <i><math>\beta</math>cat</i>   | F | AGAAGTATGAGGAGCCTCTG      |
|                                | R | CAGCCTCTGCATCATCATGT      |
| <i>Bmp2</i>                    | F | GATCTGTACCGCAGGCACTC      |
|                                | R | GAAACTCGTCACTGGGGACA      |
| <i>Bsp</i>                     | F | AACGGGTTTCAGCAGACAACC     |
|                                | R | TAAGCTCGGTAAGTGTCGCCA     |
| <i>Col1</i>                    | F | GCCTCCCAGAACATCACCTA      |
|                                | R | AGTTCCGGTGTGACTCGTG       |
| <i>Col2</i>                    | F | TGGCTTCCACTTCAGCTATG      |
|                                | R | AGGTAGGCGATGCTGTTCTT      |
| <i>Col10</i>                   | F | ACGGCACGCCTACGATGT        |
|                                | R | CCATGATTGCACTCCCTG        |
| <i>Dlx3</i>                    | F | CACCTACCACCACCAGTTCAA     |
|                                | R | GCTCCTCTTTCACCGACACTG     |
| <i>Dlx5</i>                    | F | AGAAGAGTCCCAAGCATCCGA     |
|                                | R | GCCATAAGAAGCAGAGGTAGG     |
| <i>Dlx6</i>                    | F | TTCCCGAGAGAGCCGA ACT      |
|                                | R | GTGGGTTACTACCCTGCTTCA     |
| <i>Dmp1</i>                    | F | TCCAGCTCAGAAAGCCAGTCC     |
|                                | R | AGAACGGCTGTCCTGCTCAGA     |
| <i>Hif1<math>\alpha</math></i> | F | TGACGGCGACATGGTTTACA      |
|                                | R | ACTAAACACACAGCGGAGCT      |
| <i>Hif2<math>\alpha</math></i> | F | TCATTGCTGTGGTGACCCAA      |
|                                | R | AGAGCAAAGACGTGTCCACC      |
| <i>Ihh</i>                     | F | CCCCAACTACAATCCCGACATC    |
|                                | R | CGCCAGCAGTCCATACTTATTTTCG |
| <i>Mgp</i>                     | F | CCTGTGCTACGAATCTCACGAA    |
|                                | R | TCGCAGGCCTCTCTGTTGAT      |
| <i>Mmp9</i>                    | F | CCATGCACTGGGCTTAGATCAT    |
|                                | R | CAGATACTGGATGCCGTCTATGTC  |
| <i>Mmp13</i>                   | R | CATCCATCCCGTGACCTTAT      |
|                                | F | TCATAACCATTTCAGAGCCCA     |
| <i>Ocn</i>                     | F | CTCTCTCTGCTCACTCTGCT      |

|              |   |                           |
|--------------|---|---------------------------|
|              | R | TTTGTAGGCGGTCTTCAAGC      |
| <i>Opg</i>   | F | TGACCTCTGTGAAAGCAGCGTG    |
|              | R | GCCCTTCAAGGTGTCTTGGTCA    |
| <i>Opn</i>   | F | TACAGTCGATGTCCCCAACG      |
|              | R | TGATCAGAGGGCATGCTCAG      |
| <i>Osx</i>   | F | TCCTCTCTGCTTGAGGAAGAAG    |
|              | R | GAGTCCATTGGTGCTTGAGAAG    |
| <i>Rankl</i> | F | GACTCCTGCAGGAGGATGAA      |
|              | R | GTCCTCTTGGTACCACGATC      |
| <i>Runx2</i> | F | AAAGCCAGAGTGGACCCTTCCA    |
|              | R | ATAGCGTGCTGCCATTCGAGGT    |
| <i>Shh</i>   | F | GCCTACAAGCAGTTTATTCCCA    |
|              | R | GTGAGTTCCTTAAATCGTTCGG    |
| <i>Sox9</i>  | F | CGGAGGAAGTCGGTGAAGA       |
|              | R | GTCGGTTTTGGGAGTGGTG       |
| <i>Tgfa</i>  | F | AGCGCTGGGTATCCTGTTAG      |
|              | R | CAAAAACCGGCAGGTTCCAT      |
| <i>Trap2</i> | F | CTGCAGGTTGTGGTCATGTCC     |
|              | R | CACTCAGCTGTCCTGGCTCAA     |
| <i>Vegf</i>  | F | ATATCAGGCTTTCTGGATTAAGGAC |
|              | R | CAGACGAAAGAAAGACAGAACAAG  |

808
